# Supplementary material for: Meta-analytical transdiagnostic neural correlates in common pediatric psychiatric disorders
Source: PubMed Central journal article supplement (PMC8941086; doi:10.1038/s41598-022-08909-3), 2022-03-22
Supplement: 41598_2022_8909_MOESM1_ESM.pdf [file 41598_2022_8909_MOESM1_ESM.pdf]

– SUPPLEMENTARY MATERIAL –

**Meta-analytical Transdiagnostic Neural Correlates  
in common Pediatric Psychiatric Disorders**

Jules R. Dugré, MSc <sup>1,2</sup>, Simon B. Eickhoff <sup>3,4</sup> & Stéphane Potvin, PhD <sup>1,2</sup>

<sup>1</sup> Research Center of the Institut Universitaire en Santé Mentale de Montréal, Montreal, Canada

<sup>2</sup> Department of Psychiatry and Addictology, Faculty of medicine, University of Montreal, Montreal, Canada

<sup>3</sup> Research Centre Jülich, Institute of Neuroscience and Medicine (INM-7), Jülich, Germany.

<sup>4</sup> Institute for Systems Neuroscience, Heinrich Heine University, Düsseldorf, Germany.

**Corresponding authors**

Jules Roger Dugré, PhD Candidate & Stéphane Potvin, PhD;  
Research Center of the Institut Universitaire en Santé Mentale de Montréal; 7331 Hochelaga,  
Montreal, Quebec, Canada; H1N 3V2; Phone: 514-251-4015;  
Email: jules.dugre@umontreal.ca / stephane.potvin@umontreal.ca

# Table of Contents

|                                                                                           |    |
|-------------------------------------------------------------------------------------------|----|
| <b>Supplementary Table 1.</b> Included studies: Sample characteristics and fMRI tasks     | 3  |
| <b>Supplementary Table 2.</b> Included studies: Medication and task-characteristics       | 6  |
| <b>Additional Information about the Correlation-Matrix Hierarchical Clustering</b>        | 9  |
| <b>Supplementary Figure 1.</b> Metrics computed for K=2 to 15 clustering solutions        | 11 |
| <b>Supplementary Figure 2.</b> Probability of Aberrant MAG by disorder class              | 12 |
| <b>Supplementary Figure 3.</b> Results from the forward (classical) ALE meta-analyses     | 13 |
| <b>Supplementary Table 3.</b> Results from disorder-specific meta-analyses (p<0.001 unc.) | 14 |
| <b>Supplementary Table 4.</b> List of fMRI tasks per MAGs                                 | 15 |
| <b>Supplementary Phenotype Assessment: Literature Bias &amp; Subanalyses</b>              | 18 |
| <b>Supplementary Table 5.</b> Disorder-specific sample and task characteristics           | 19 |
| <b>Supplementary Table 6.</b> Disorder-specific comorbidities                             | 19 |
| <b>Supplementary Table 7.</b> Disorder-specific comorbidities per MAGs                    | 20 |
| <b>Disorder-Specific ALE Meta-analyses</b>                                                | 21 |
| <b>REFERENCES</b>                                                                         | 22 |

**Supplementary Table 1.** Included studies: Sample characteristics and fMRI task.

| Primary Diagnosis | First Author, Year                       | Experimental Task               | TD (N=) | CASES (N=) | Male (%) | Mean Age |
|-------------------|------------------------------------------|---------------------------------|---------|------------|----------|----------|
| ADHD              | Braet et al. 2011 (1)                    | Go-No/Go                        | 38      | 20         | 0.85     | 14.1     |
| ADHD              | Bédard et al. 2014 (2)                   | N-Back                          | 21      | 24         | 0.88     | 12.4     |
| ADHD              | Bollmann et al. 2017 (3)                 | Spatial Working Memory Task     | 14      | 12         | 0.47     | 10.9     |
| ADHD              | Booth et al. 2005 (4)                    | Go-No/Go                        | 12      | 12         | 0.67     | 11.0     |
| ADHD              | Cao et al. 2008 (5)                      | Cued Target Detection           | 13      | 12         | 1.00     | 13.4     |
| ADHD              | Cerullo et al. 2009 (6)                  | Continuous Performance Task     | 13      | 10         | 0.70     | 14.0     |
| ADHD              | Chou et al. 2015 <sub>1</sub> (7)        | Stroop Task                     | 20      | 25         | 0.85     | 10.5     |
| ADHD              | Chou et al. 2015 <sub>2</sub> (7)        | Stroop Task                     | 20      | 25         | 0.85     | 10.5     |
| ADHD              | Christakou et al. 2013 (8)               | Sustained Attention Task        | 20      | 20         | 1.00     | 14.0     |
| ADHD              | Durston et al. 2006 (9)                  | Go-No/Go                        | 11      | 11         | 1.00     | 13.9     |
| ADHD              | Durston et al. 2007 <sub>1</sub> (10)    | Go-No/Go                        | 12      | 12         | 1.00     | 14.9     |
| ADHD              | Durston et al. 2007 <sub>2</sub> (10)    | Go-No/Go                        | 12      | 12         | 1.00     | 14.9     |
| ADHD              | Ercan et al. 2016 (11)                   | Go-No/Go                        | 100     | 50         | 0.58     | 11.0     |
| ADHD              | Fan et al. 2014 (12)                     | Stroop Task                     | 23      | 25         | 0.92     | 10.9     |
| ADHD              | Hart et al. 2014 (13)                    | Stop Task                       | 20      | 20         | 1.00     | 12.1     |
| ADHD              | Hart et al. 2014 (14)                    | Stop Task                       | 30      | 30         | 1.00     | 13.9     |
| ADHD              | Hauser et al. 2014 (15)                  | Reversal Learning Task          | 20      | 20         | 0.65     | 14.6     |
| ADHD              | Hwang et al. 2015 (16)                   | Stroop Paradigm                 | 35      | 26         | 0.65     | 14.5     |
| ADHD              | Iannaccone et al. 2015 <sub>1</sub> (17) | Speeded Flanker Task            | 18      | 18         | 0.61     | 14.5     |
| ADHD              | Iannaccone et al. 2015 <sub>2</sub> (17) | Speeded Flanker Task            | 18      | 18         | 0.61     | 14.5     |
| ADHD              | Janssen et al. 2015 (18)                 | Stop-Signal Task                | 17      | 21         | 0.91     | 10.6     |
| ADHD              | Kohls et al. 2014 (19)                   | Rewarded Go-No/Go               | 17      | 16         | 1.00     | 14.5     |
| ADHD              | Konrad et al. 2006 (20)                  | Attention Network Test          | 16      | 16         | 1.00     | 10.2     |
| ADHD              | Krauel et al. 2007 (21)                  | Recognition Test                | 12      | 12         | 1.00     | 14.5     |
| ADHD              | Li et al. 2014 (22)                      | N-Back                          | 27      | 33         | 1.00     | 9.9      |
| ADHD              | Ma et al. 2012 (23)                      | Go-No/Go                        | 15      | 15         | 0.53     | 9.9      |
| ADHD              | Ma et al. 2016 (24)                      | Rewarded Stroop Task            | 33      | 25         | 0.76     | 15.4     |
| ADHD              | Massat et al. 2012 (25)                  | N-Back                          | 14      | 19         | 0.47     | 10.8     |
| ADHD              | Massat et al. 2018 (26)                  | Stop Signal Task                | 19      | 18         | 0.44     | 10.6     |
| ADHD              | Metin et al. 2017 (27)                   | Spatial Attention Paradigm      | 16      | 19         | 0.74     | 10.32    |
| ADHD              | Mostofsky et al. 2006 (28)               | Finger Sequencing Paradigm      | 11      | 11         | 0.73     | 10.4     |
| ADHD              | Norman et al. 2017 (29)                  | Sustained Attention Task        | 20      | 20         | 1.00     | 15.0     |
| ADHD              | Norman et al. 2018 (30)                  | Iowa Gambling Task              | 20      | 16         | 1.00     | 14.6     |
| ADHD              | O'Conaill et al. 2015 (31)               | Visual Search Task              | 21      | 19         | 0.90     | 11.9     |
| ADHD              | Orinstein et al. 2014 (32)               | Auditory Oddball Attention Task | 20      | 18         | 0.78     | 15.2     |
| ADHD              | Passarotti et al. 2010 (33)              | N-Back                          | 19      | 14         | 0.64     | 13.0     |
| ADHD              | Passarotti et al. 2010 (34)              | Emotional Valence Stroop Task   | 14      | 15         | 0.80     | 12.9     |
| ADHD              | Passarotti et al. 2010 (35)              | Response Inhibition Task        | 15      | 11         | 0.55     | 13.1     |
| ADHD              | Poissant et al. 2016 (A) (36)            | Pictures Story                  | 12      | 7          | 0.00     | 11.0     |
| ADHD              | Poissant et al. 2016 (B) (36)            | Pictures Story                  | 9       | 16         | 1.00     | 11.0     |
| ADHD              | Posner et al. 2011 (37)                  | Subliminal Fearful Faces        | 15      | 15         | 0.87     | 13.5     |
| ADHD              | Posner et al. 2011 (38)                  | Emotional Stroop Task           | 15      | 15         | 0.87     | 13.5     |
| ADHD              | Rubia et al. 2005 (39)                   | Stop Task                       | 22      | 16         | 1.00     | 13.0     |
| ADHD              | Rubia et al. 2008 (40)                   | Stop Task                       | 20      | 20         | 1.00     | 13.2     |
| ADHD              | Rubia et al. 2009 (41)                   | Reward Continuous Performance   | 16      | 18         | 1.00     | 13.3     |
| ADHD              | Rubia et al. 2009 (42)                   | Simon Task                      | 20      | 20         | 1.00     | 13.2     |
| ADHD              | Rubia et al. 2009 (43)                   | Delay Discounting Task          | 10      | 10         | 1.00     | 14.0     |
| ADHD              | Rubia et al. 2010 (44)                   | Visual-Spatial Switch Task      | 20      | 14         | 1.00     | 13.3     |
| ADHD              | Rubia et al. 2010 <sub>1</sub> (45)      | Stop Task                       | 20      | 18         | 1.00     | 14.5     |

|        |                                               |                                 |     |     |      |      |
|--------|-----------------------------------------------|---------------------------------|-----|-----|------|------|
| ADHD   | Rubia et al. 2010 <sub>2</sub> (45)           | Switch Task                     | -   | 12  | 1.00 | 13.7 |
| ADHD   | Rubia et al. 2011 (46)                        | Simon Task                      | 20  | 18  | 1.00 | 14.3 |
| ADHD   | Schwarz et al. 2015 (47)                      | Anti-Saccades                   | 11  | 11  | 0.64 | 10.4 |
| ADHD   | Sheridan et al. 2007 (48)                     | Match-to-Sample Task            | 10  | 10  | 0.00 | 15.2 |
| ADHD   | Silk et al. 2008 (49)                         | Raven's Progressive Matrices    | 12  | 12  | 1.00 | 11.2 |
| ADHD   | Siniatchkin et al. 2012 (50)                  | Go/NoGo                         | 27  | 17  | 0.83 | 9.3  |
| ADHD   | Smith et al. 2008 (51)                        | Time Discrimination             | 17  | 21  | 1.00 | 12.8 |
| ADHD   | Spinelli et al. 2011 (52)                     | Go-No/Go                        | 17  | 13  | 0.69 | 10.6 |
| ADHD   | Spinelli et al. 2011 (53)                     | Go-No/Go                        | 17  | 13  | 0.69 | 10.6 |
| ADHD   | Stevens et al. 2017 <sub>1</sub> (A) (54)     | Monetary Incentive Delay        | 134 | 40  | 0.78 | 14.8 |
| ADHD   | Stevens et al. 2017 <sub>2</sub> (A) (54)     | Monetary Incentive Delay        | -   | -   | 0.78 | 14.8 |
| ADHD   | Stevens et al. 2017 <sub>1</sub> (B) (54)     | Monetary Incentive Delay        | -   | 31  | 0.84 | 15.0 |
| ADHD   | Stevens et al. 2017 <sub>2</sub> (B) (54)     | Monetary Incentive Delay        | -   | -   | 0.84 | 15.0 |
| ADHD   | Stevens et al. 2017 (C) (54)                  | Monetary Incentive Delay        | -   | 46  | 0.80 | 15.1 |
| ADHD   | Tamm et al. 2004 (55)                         | Go-No/Go                        | 12  | 10  | 1.00 | 16.0 |
| ADHD   | Tamm et al. 2006 (56)                         | Oddball Task                    | 12  | 14  | 1.00 | 15.6 |
| ADHD   | Tamm et al. 2012 (57)                         | Fluid Reasoning Task            | 10  | 12  | 0.54 | 9.0  |
| ADHD   | Tegelbeckers et al. 2015 (58)                 | Visual Oddball Task             | 19  | 19  | 1.00 | 13.3 |
| ADHD   | Vance et al. 2007 (59)                        | Mental Rotation Task            | 12  | 12  | 1.00 | 11.1 |
| ADHD   | van Ewijk et al. 2015 (60)                    | Spatial span task               | 103 | 109 | 0.60 | 17.1 |
| ADHD   | van Rooij et al. 2015 (61)                    | Stop-Signal Task                | 111 | 185 | 0.70 | 17.3 |
| ADHD   | Vetter et al. 2018 (62)                       | perceptual discrimination task  | 25  | 25  | 1.00 | 14.3 |
| ADHD   | Vloet et al. 2010 (63)                        | Spatial Stimulus-Response       | 14  | 14  | 1.00 | 11.3 |
| ADHD   | von Rhein et al. 2015 (64)                    | monetary incentive delay task   | 108 | 150 | 0.70 | 17.7 |
| ADHD   | Wang et al. 2013 (65)                         | Continuous Performance Task     | 31  | 28  | 0.89 | 9.6  |
| ADHD   | Hegarty et al. 2021 (66)                      | Stop-Signal Task                | 30  | 30  | 0.67 | 10.1 |
| ADHD   | Finger et al., 2008 (67)                      | Probabilistic Reversal Task     | 14  | 14  | 0.71 | 13.4 |
| ADHD   | Gatzke-Kopp et al. 2009 (68)                  | Monetary Incentive task         | 11  | 19  | 1.00 | 13.6 |
| ADHD   | Bubbenzer-Busch et al. 2016 <sub>1</sub> (69) | Point Subtraction Aggression    | 27  | 27  | 1.00 | 10.9 |
| ADHD   | Bubbenzer-Busch et al. 2016 <sub>2</sub> (69) | Point Subtraction Aggression    | 27  | 27  | 1.00 | 10.9 |
| CD/ODD | Banich et al. 2007 (70)                       | Stroop Task                     | 12  | 12  | 1.00 | 16.7 |
| CD/ODD | Bjork et al. 2010 (71)                        | Monetary Incentive Delay Task   | 12  | 12  | 1.00 | 15.4 |
| CD/ODD | Crowley et al. 2010 <sub>1</sub> (72)         | Colorado Balloon Game           | 20  | 20  | 1.00 | 16.5 |
| CD/ODD | Crowley et al. 2010 <sub>2</sub> (72)         | Colorado Balloon Game           | 20  | 20  | 1.00 | 16.5 |
| CD/ODD | Dong et al. 2017 (73)                         | Facial Expression (Pain)        | 36  | 30  | 1.00 | 15.1 |
| CD/ODD | Fairchild et al. 2014 (74)                    | Emotional Face Task             | 20  | 20  | 0.00 | 16.9 |
| CD/ODD | Fehlbaum et al. 2018 (75)                     | Affective Stroop Task           | 39  | 39  | 0.74 | 15.9 |
| CD/ODD | Finger et al. 2011 <sub>1</sub> (76)          | Probabilistic Reversal Task     | 15  | 15  | 0.60 | 14.1 |
| CD/ODD | Finger et al. 2011 <sub>2</sub> (76)          | Probabilistic Reversal Task     | 15  | 15  | 0.60 | 14.1 |
| CD/ODD | Herpertz et al. 2008 (77)                     | Passive-Viewing (Emotional)     | 22  | 22  | 1.00 | 14.7 |
| CD/ODD | Hwang et al. 2016 (A) (78)                    | Affective Stroop Task           | 28  | 17  | 0.71 | 14.8 |
| CD/ODD | Hwang et al. 2016 (B) (78)                    | Affective Stroop Task           | -   | 18  | 0.56 | 14.6 |
| CD/ODD | Klapwijk et al., 2016a (79)                   | Empathic Emotional Face Task    | 33  | 23  | 1.00 | 16.6 |
| CD/ODD | Klapwijk et al., 2016b (80)                   | Dictator Game                   | 33  | 32  | 1.00 | 16.8 |
| CD/ODD | Marsh et al., 2011 (81)                       | Implicit Association Test       | 14  | 14  | 0.57 | 14.4 |
| CD/ODD | Marsh et al., 2013 (82)                       | Empathic Situation of Pain Task | 21  | 14  | 0.54 | 15.4 |
| CD/ODD | Passamonti et al., 2010 (A) (83)              | Emotional Face Task             | 40  | 27  | 1.00 | 17.7 |
| CD/ODD | Passamonti et al., 2010 (B) (83)              | Emotional Face Task             | -   | 25  | 1.00 | 17.1 |
| CD/ODD | Rubia et al. 2008 (40)                        | Stop Task                       | 20  | 13  | 1.00 | 13.0 |
| CD/ODD | Rubia et al. 2009 (41)                        | Reward Continuous Performance   | 16  | 14  | 1.00 | 12.8 |
| CD/ODD | Rubia et al. 2009 (42)                        | Simon Task                      | 20  | 13  | 1.00 | 12.9 |
| CD/ODD | Rubia et al. 2010 (44)                        | Visual-Spatial Switch Task      | 20  | 14  | 1.00 | 12.6 |

|        |                                           |                                  |    |    |      |      |
|--------|-------------------------------------------|----------------------------------|----|----|------|------|
| CD/ODD | Schwenck et al., 2017 (84)                | monetary gambling task           | 24 | 19 | 1.00 | 13.8 |
| CD/ODD | Thornton et al., 2017 (85)                | Animacy Attention Task           | 20 | 29 | 0.69 | 14.7 |
| CD/ODD | White et al., 2012a (86)                  | Eye Gaze Task                    | 19 | 17 | 0.76 | 15.5 |
| CD/ODD | White et al., 2012b (87)                  | Emotion-Attention Bars task      | 17 | 15 | 0.80 | 15.7 |
| CD/ODD | White et al., 2013 <sub>1</sub> (88)      | Passive Avoidance Task           | 18 | 20 | 0.82 | 15.2 |
| CD/ODD | White et al., 2013 <sub>2</sub> (88)      | Passive Avoidance Task           | 18 | 20 | 0.82 | 15.2 |
| CD/ODD | White et al., 2014 (89)                   | Doors Task                       | 15 | 15 | 0.73 | 14.4 |
| CD/ODD | Zhang et al., 2015 (90)                   | Go/Stop Task                     | 40 | 29 | 1.00 | 15.1 |
| CD/ODD | Zhu et al. 2014 (91)                      | Go/Stop Task                     | 10 | 11 | 1.00 | 11.5 |
| CD/ODD | Raschle et al. 2019 (92)                  | emotion-regulation task          | 29 | 30 | 0.00 | 16.3 |
| ANX    | Yang et al. 2004 (93)                     | Emotional Perception             | 6  | 5  | 0.20 | 13.0 |
| ANX    | Carrion et al. 2008 (94)                  | Go-No/Go                         | 14 | 16 | 0.56 | 13.7 |
| ANX    | Keding-Herrington et al. 2016 (95)        | Dynamic Face Task                | 25 | 28 | 0.35 | 14.3 |
| ANX    | Hart et al. 2018 (96)                     | emotion discrimination task      | 27 | 20 | 0.70 | 17.5 |
| ANX    | Carlisi et al. 2017 (97)                  | face-attention paradigm          | 19 | 14 | 0.29 | 14.1 |
| ANX    | Gold et al. 2020 (98)                     | threat conditioning              | 47 | 53 | 0.45 | 12.8 |
| ANX    | Thomas et al. 2001 (99)                   | Passive-Viewing Emotional Face   | 12 | 12 | 0.58 | 12.8 |
| ANX    | Monk et al. 2006 (100)                    | Emotional Face probe detection   | 15 | 18 | 0.47 | 12.3 |
| ANX    | Monk et al. 2008 (101)                    | Emotional Face visual probe task | 12 | 17 | 0.65 | 13.1 |
| ANX    | Strawn et al. 2012 (102)                  | Emotional CPT                    | 10 | 10 | 0.40 | 14.3 |
| ANX    | Yin et al. 2017 (103)                     | Valence Evaluation Task          | 14 | 20 | 0.25 | 15.7 |
| ANX    | Burkhouse et al. 2018 (104)               | Emotional Conflict Task          | 25 | 25 | 0.41 | 15.3 |
| ANX    | Blair et al. 2011 (105)                   | Emotional Face Task              | 16 | 14 | 0.50 | 13.3 |
| DEP    | Chantiluke et al. 2012 <sub>1</sub> (106) | Reward Continuous Performance    | 21 | 20 | 0.50 | 16.2 |
| DEP    | Chantiluke et al. 2012 <sub>2</sub> (106) | Reward Continuous Performance    | 21 | 20 | 0.50 | 16.2 |
| DEP    | Colich et al. 2015 (107)                  | modified affective Go/No-Go      | 15 | 18 | 0.17 | 15.6 |
| DEP    | Davey et al. 2011 (108)                   | Being-Liked (Emotional Face)     | 20 | 19 | 0.35 | 18.6 |
| DEP    | Diler et al. 2013 (109)                   | emotional faces (gender)         | 10 | 10 | 0.20 | 15.9 |
| DEP    | Diler et al. 2014 (110)                   | Go/No-Go                         | 10 | 10 | 0.20 | 15.9 |
| DEP    | Gaffrey et al. 2013 (111)                 | Facial Emotion Viewing Task      | 31 | 23 | 0.57 | 5.0  |
| DEP    | Halari et al. 2009 <sub>1</sub> (112)     | Simon Task                       | 21 | 21 | 0.48 | 16.2 |
| DEP    | Halari et al. 2009 <sub>2</sub> (112)     | Switch Task                      | 21 | 21 | 0.48 | 16.2 |
| DEP    | Halari et al. 2009 <sub>3</sub> (112)     | Stop Task                        | 21 | 21 | 0.48 | 16.2 |
| DEP    | Hall et al. 2014 (113)                    | Emotional Faces Task             | 23 | 32 | 0.26 | 15.5 |
| DEP    | Roberson-Nay et al. 2006 (114)            | Emotional Face Task: Encoding    | 23 | 10 | 0.30 | 13.8 |
| DEP    | Sharp et al. 2014 (115)                   | Modified card-guessing game      | 19 | 14 | 0.00 | 13.4 |
| DEP    | Tao et al. 2012 (116)                     | Emotional Face Task (gender)     | 21 | 19 | 0.42 | 14.2 |
| DEP    | Yang et al. 2009 (117)                    | Stop Task                        | 13 | 13 | 0.46 | 16.0 |
| DEP    | Yang et al. 2010 (118)                    | facial-emotion matching task     | 12 | 12 | 0.58 | 15.9 |
| DEP    | Pan et al. 2011 (119)                     | Go/No-Go task                    | -  | 15 | 0.47 | 15.9 |
| DEP    | Pan et al. 2013 (A) (120)                 | Iowa Gambling Task               | 13 | 15 | 0.27 | 16.2 |
| DEP    | Pan et al. 2013 (B) (120)                 | Iowa Gambling Task               | -  | 14 | 0.50 | 15.8 |
| DEP    | Groschwitz et al. 2016 (121)              | Cyberball Task                   | 15 | 14 | 0.21 | 15.4 |
| DEP    | Suzuki et al. 2014 (A) (122)              | Emotional Face Task              | 51 | 42 | 0.48 | 9.8  |
| DEP    | Suzuki et al. 2014 (B) (122)              | Emotional Face Task              | -  | 22 | 0.41 | 10.2 |
| DEP    | De Bellis et Hooper 2013 (123)            | Emotional oddball task           | 5  | 5  | 0.40 | 15.5 |

*Note.* (A)(B) = distinct samples from the same study. 1-2 = distinct task contrasts or fMRI task from the same study. MED = Medication (in %); COG = Cognitive; RI = Response Inhibition; ATTN = Attention; EMO = Emotional; BOTH = Both Positive and Negative Emotion; POS = Positive; NEG = Negative;

Supplementary Table 2. Included studies: Medication and task-characteristics

| Primary Diagnosis | First Author, Year                       | MED (%) | Task-Characteristics |    |      |     |      |     |     |        |  |
|-------------------|------------------------------------------|---------|----------------------|----|------|-----|------|-----|-----|--------|--|
|                   |                                          |         | COG                  | RI | ATTN | EMO | BOTH | POS | NEG | Others |  |
| ADHD              | Braet et al. 2011 (1)                    | NA      | X                    | X  |      |     |      |     |     |        |  |
| ADHD              | Bédard et al. 2014 (2)                   | 0.08    | X                    |    |      |     |      |     |     |        |  |
| ADHD              | Bollmann et al. 2017 (3)                 | 0.67    | X                    |    |      |     |      |     |     |        |  |
| ADHD              | Booth et al. 2005 (4)                    | 1.00    | X                    | X  |      |     |      |     |     |        |  |
| ADHD              | Cao et al. 2008 (5)                      | 0.25    | X                    |    | X    |     |      |     |     |        |  |
| ADHD              | Cerullo et al. 2009 (6)                  | 0.00    | X                    |    | X    |     |      |     |     |        |  |
| ADHD              | Chou et al. 2015 <sub>1</sub> (7)        | 0.00    | X                    | X  |      |     |      |     |     |        |  |
| ADHD              | Chou et al. 2015 <sub>2</sub> (7)        | 0.00    | X                    | X  |      |     |      |     |     |        |  |
| ADHD              | Christakou et al. 2013 (8)               | 0.00    | X                    |    | X    |     |      |     |     |        |  |
| ADHD              | Durston et al. 2006 (9)                  | 0.55    | X                    | X  |      |     |      |     |     |        |  |
| ADHD              | Durston et al. 2007 <sub>1</sub> (10)    | 0.75    | X                    | X  |      |     |      |     |     |        |  |
| ADHD              | Durston et al. 2007 <sub>2</sub> (10)    | 0.75    | X                    | X  |      |     |      |     |     |        |  |
| ADHD              | Ercan et al. 2016 (11)                   | NA      | X                    | X  |      |     |      |     |     |        |  |
| ADHD              | Fan et al. 2014 (12)                     | 0.24    | X                    | X  |      |     |      |     |     |        |  |
| ADHD              | Hart et al. 2014 (13)                    | 0.30    | X                    | X  |      |     |      |     |     |        |  |
| ADHD              | Hart et al. 2014 (14)                    | 0.30    | X                    | X  |      |     |      |     |     |        |  |
| ADHD              | Hauser et al. 2014 (15)                  | 0.80    |                      |    |      | X   |      |     | X   |        |  |
| ADHD              | Hwang et al. 2015 (16)                   | 0.42    | X                    | X  |      | X   |      | X   |     |        |  |
| ADHD              | Iannaccone et al. 2015 <sub>1</sub> (17) | 0.72    | X                    | X  |      |     |      |     |     |        |  |
| ADHD              | Iannaccone et al. 2015 <sub>2</sub> (17) | 0.72    | X                    | X  |      |     |      |     |     |        |  |
| ADHD              | Janssen et al. 2015 (18)                 | 0.90    | X                    | X  |      |     |      |     |     |        |  |
| ADHD              | Kohls et al. 2014 (19)                   | 0.56    |                      |    |      | X   |      |     | X   |        |  |
| ADHD              | Konrad et al. 2006 (20)                  | 0.00    | X                    |    | X    |     |      |     |     |        |  |
| ADHD              | Krauel et al. 2007 (21)                  | 0.42    | X                    |    |      |     |      |     |     |        |  |
| ADHD              | Li et al. 2014 (22)                      | 0.00    | X                    |    |      |     |      |     |     |        |  |
| ADHD              | Ma et al. 2012 (23)                      | 0.20    | X                    | X  |      |     |      |     |     |        |  |
| ADHD              | Ma et al. 2016 (24)                      | 0.60    |                      |    |      | X   |      |     | X   |        |  |
| ADHD              | Massat et al. 2012 (25)                  | 0.00    | X                    |    |      |     |      |     |     |        |  |
| ADHD              | Massat et al. 2018 (26)                  | 0.00    | X                    | X  |      |     |      |     |     |        |  |
| ADHD              | Metin et al. 2017 (27)                   | 0.00    |                      |    |      | X   |      |     | X   |        |  |
| ADHD              | Mostofsky et al. 2006 (28)               | 0.73    |                      |    |      |     |      |     |     | X      |  |
| ADHD              | Norman et al. 2017 (29)                  | 0.35    | X                    |    | X    |     |      |     |     |        |  |
| ADHD              | Norman et al. 2018 (30)                  | 0.50    |                      |    |      | X   |      | X   |     |        |  |
| ADHD              | O'Conaill et al. 2015 (31)               | 0.79    | X                    |    | X    |     |      |     |     |        |  |
| ADHD              | Orinstein et al. 2014 (32)               | NA      | X                    |    | X    |     |      |     |     |        |  |
| ADHD              | Passarotti et al. 2010 (33)              | 0.00    |                      |    |      | X   |      | X   |     |        |  |
| ADHD              | Passarotti et al. 2010 (34)              | 0.00    |                      |    |      | X   |      | X   |     |        |  |
| ADHD              | Passarotti et al. 2010 (35)              | 0.00    | X                    | X  |      |     |      |     |     |        |  |
| ADHD              | Poissant et al. 2016 (A) (36)            | NA      | X                    |    |      |     |      |     |     |        |  |
| ADHD              | Poissant et al. 2016 (B) (36)            | NA      | X                    |    |      |     |      |     |     |        |  |
| ADHD              | Posner et al. 2011 (37)                  | 0.00    |                      |    |      | X   |      |     |     | X      |  |
| ADHD              | Posner et al. 2011 (38)                  | 0.53    |                      |    |      | X   |      | X   |     |        |  |
| ADHD              | Rubia et al. 2005 (39)                   | 0.00    | X                    | X  |      |     |      |     |     |        |  |
| ADHD              | Rubia et al. 2008 (40)                   | 0.00    | X                    | X  |      |     |      |     |     |        |  |
| ADHD              | Rubia et al. 2009 (41)                   | 0.00    | X                    |    | X    | X   |      |     | X   |        |  |
| ADHD              | Rubia et al. 2009 (42)                   | 0.00    | X                    | X  |      |     |      |     |     |        |  |
| ADHD              | Rubia et al. 2009 (43)                   | 0.00    |                      |    |      | X   |      |     | X   |        |  |
| ADHD              | Rubia et al. 2010 (44)                   | 0.00    | X                    |    | X    |     |      |     |     |        |  |

|        |                                               |      |   |   |  |   |   |   |   |
|--------|-----------------------------------------------|------|---|---|--|---|---|---|---|
| ADHD   | Rubia et al. 2010 <sub>1</sub> (45)           | 0.00 | X | X |  |   |   |   |   |
| ADHD   | Rubia et al. 2010 <sub>2</sub> (45)           | 0.00 | X |   |  | X |   |   |   |
| ADHD   | Rubia et al. 2011 (46)                        | 0.00 | X | X |  |   |   |   |   |
| ADHD   | Schwarz et al. 2015 (47)                      | 0.91 |   |   |  |   |   |   | X |
| ADHD   | Sheridan et al. 2007 (48)                     | 0.20 | X |   |  |   |   |   |   |
| ADHD   | Silk et al. 2008 (49)                         | 0.00 | X |   |  |   |   |   |   |
| ADHD   | Siniatchkin et al. 2012 (50)                  | 0.75 | X | X |  |   |   |   |   |
| ADHD   | Smith et al. 2008 (51)                        | 0.00 | X |   |  |   |   |   |   |
| ADHD   | Spinelli et al. 2011 (52)                     | 0.15 | X | X |  |   |   |   |   |
| ADHD   | Spinelli et al. 2011 (53)                     | 0.15 | X | X |  |   |   |   |   |
| ADHD   | Stevens et al. 2017 <sub>1</sub> (A) (54)     | 0.68 | X |   |  |   |   |   |   |
| ADHD   | Stevens et al. 2017 <sub>2</sub> (A) (54)     | 0.68 |   |   |  | X |   | X |   |
| ADHD   | Stevens et al. 2017 <sub>1</sub> (B) (54)     | 0.77 | X | X |  |   |   |   |   |
| ADHD   | Stevens et al. 2017 <sub>2</sub> (B) (54)     | 0.77 |   |   |  | X |   | X |   |
| ADHD   | Stevens et al. 2017 (C) (54)                  | 0.67 | X |   |  |   |   |   |   |
| ADHD   | Tamm et al. 2004 (55)                         | 0.50 | X | X |  |   |   |   |   |
| ADHD   | Tamm et al. 2006 (56)                         | 0.36 | X |   |  | X |   |   |   |
| ADHD   | Tamm et al. 2012 (57)                         | 0.00 | X |   |  |   |   |   |   |
| ADHD   | Tegelbeckers et al. 2015 (58)                 | 0.53 | X |   |  | X |   |   |   |
| ADHD   | Vance et al. 2007 (59)                        | 0.00 | X |   |  |   |   |   |   |
| ADHD   | van Ewijk et al. 2015 (60)                    | 0.83 | X |   |  |   |   |   |   |
| ADHD   | van Rooij et al. 2015 (61)                    | 0.54 | X | X |  |   |   |   |   |
| ADHD   | Vetter et al. 2018 (62)                       | NA   | X |   |  | X |   |   | X |
| ADHD   | Vloet et al. 2010 (63)                        | NA   | X |   |  | X |   |   |   |
| ADHD   | von Rhein et al. 2015 (64)                    | 0.76 |   |   |  | X |   | X |   |
| ADHD   | Wang et al. 2013 (65)                         | 0.00 | X |   |  | X |   |   |   |
| ADHD   | Hegarty et al. 2021 (66)                      | 0.00 | X | X |  |   |   |   |   |
| ADHD   | Finger et al., 2008 (67)                      | 0.71 |   |   |  | X | X |   |   |
| ADHD   | Gatzke-Kopp et al. 2009 (68)                  | 0.53 |   |   |  | X |   | X |   |
| ADHD   | Bubbenzer-Busch et al. 2016 <sub>1</sub> (69) | 0.85 |   |   |  | X |   |   | X |
| ADHD   | Bubbenzer-Busch et al. 2016 <sub>2</sub> (69) | 0.85 |   |   |  | X |   | X |   |
| CD/ODD | Banich et al. 2007 (70)                       | NA   | X | X |  |   |   |   |   |
| CD/ODD | Bjork et al. 2010 (71)                        | 0.67 |   |   |  | X |   | X |   |
| CD/ODD | Crowley et al. 2010 <sub>1</sub> (72)         | 0.30 |   |   |  | X |   | X |   |
| CD/ODD | Crowley et al. 2010 <sub>2</sub> (72)         | 0.30 |   |   |  | X |   |   | X |
| CD/ODD | Dong et al. 2017 (73)                         | NA   |   |   |  | X |   |   | X |
| CD/ODD | Fairchild et al. 2014 (74)                    | NA   |   |   |  | X |   |   | X |
| CD/ODD | Fehlbaum et al. 2018 (75)                     | 0.90 | X | X |  | X |   |   | X |
| CD/ODD | Finger et al. 2011 <sub>1</sub> (76)          | 0.47 |   |   |  | X |   | X |   |
| CD/ODD | Finger et al. 2011 <sub>2</sub> (76)          | 0.47 |   |   |  | X |   |   | X |
| CD/ODD | Herpertz et al. 2008 (77)                     | NA   |   |   |  | X |   |   | X |
| CD/ODD | Hwang et al. 2016 (A) (78)                    | 0.24 | X | X |  | X |   |   | X |
| CD/ODD | Hwang et al. 2016 (B) (78)                    | 0.28 | X | X |  | X |   |   | X |
| CD/ODD | Klapwijk et al., 2016a (79)                   | 0.00 |   |   |  | X |   |   | X |
| CD/ODD | Klapwijk et al., 2016b (80)                   | 0.00 | X |   |  |   |   |   |   |
| CD/ODD | Marsh et al., 2011 (81)                       | 0.43 | X |   |  |   |   |   |   |
| CD/ODD | Marsh et al., 2013 (82)                       | 0.14 | X |   |  | X |   |   | X |
| CD/ODD | Passamonti et al., 2010 (A) (83)              | NA   |   |   |  | X |   |   | X |
| CD/ODD | Passamonti et al., 2010 (B) (83)              | NA   |   |   |  | X |   |   | X |
| CD/ODD | Rubia et al. 2008 (40)                        | 0.00 | X | X |  |   |   |   |   |
| CD/ODD | Rubia et al. 2009 (41)                        | 0.00 | X |   |  | X | X | X |   |
| CD/ODD | Rubia et al. 2009 (42)                        | 0.00 | X | X |  |   |   |   |   |

|        |                                           |      |   |   |   |   |   |   |
|--------|-------------------------------------------|------|---|---|---|---|---|---|
| CD/ODD | Rubia et al. 2010 (44)                    | 0.00 | X | X |   |   |   |   |
| CD/ODD | Schwenck et al., 2017 (84)                | 0.33 |   |   |   | X |   | X |
| CD/ODD | Thornton et al., 2017 (85)                | 0.14 | X | X |   |   |   |   |
| CD/ODD | White et al., 2012a (86)                  | 0.12 | X | X | X |   |   | X |
| CD/ODD | White et al., 2012b (87)                  | 0.12 |   |   | X |   |   | X |
| CD/ODD | White et al., 2013 <sub>1</sub> (88)      | 0.10 |   |   | X |   | X |   |
| CD/ODD | White et al., 2013 <sub>2</sub> (88)      | 0.10 |   |   | X |   |   | X |
| CD/ODD | White et al., 2014 (89)                   | 0.20 |   |   | X | X |   |   |
| CD/ODD | Zhang et al., 2015 (90)                   | 0.00 | X | X |   |   |   |   |
| CD/ODD | Zhu et al. 2014 (91)                      | 0.00 | X | X |   |   |   |   |
| CD/ODD | Raschle et al. 2019 (92)                  | NA   |   |   | X |   |   | X |
| ANX    | Yang et al. 2004 (93)                     | 0.00 |   |   | X |   |   | X |
| ANX    | Carrion et al. 2008 (94)                  | 0.00 | X | X |   |   |   |   |
| ANX    | Keding-Herrington et al. 2016 (95)        | 0.00 |   |   | X | X |   |   |
| ANX    | Hart et al. 2018 (96)                     | 0.00 |   |   | X |   |   | X |
| ANX    | Carlisi et al. 2017 (97)                  | 0.00 |   |   | X |   |   | X |
| ANX    | Gold et al. 2020 (98)                     | 0.00 |   |   | X |   |   | X |
| ANX    | Thomas et al. 2001 (99)                   | 0.00 |   |   | X |   |   | X |
| ANX    | Monk et al. 2006 (100)                    | 0.00 |   |   | X |   |   | X |
| ANX    | Monk et al. 2008 (101)                    | 0.00 |   |   | X |   |   | X |
| ANX    | Strawn et al. 2012 (102)                  | 0.00 | X | X | X | X |   |   |
| ANX    | Yin et al. 2017 (103)                     | 0.00 |   |   | X |   |   | X |
| ANX    | Burkhouse et al. 2018 (104)               | 0.00 |   |   | X |   |   | X |
| ANX    | Blair et al. 2011 (105)                   | 0.00 |   |   | X |   |   | X |
| DEP    | Chantiluke et al. 2012 <sub>1</sub> (106) | 0.00 | X | X | X |   | X |   |
| DEP    | Chantiluke et al. 2012 <sub>2</sub> (106) | 0.00 | X | X | X |   | X |   |
| DEP    | Colich et al. 2015 (107)                  | 0.39 | X | X | X |   |   | X |
| DEP    | Davey et al. 2011 (108)                   | 0.47 |   |   | X |   |   |   |
| DEP    | Diler et al. 2013 (109)                   | 0.60 |   |   | X | X |   |   |
| DEP    | Diler et al. 2014 (110)                   | 0.47 | X | X |   |   |   |   |
| DEP    | Gaffrey et al. 2013 (111)                 | 0.00 |   |   | X | X |   |   |
| DEP    | Halari et al. 2009 <sub>1</sub> (112)     | 0.00 | X | X |   |   |   |   |
| DEP    | Halari et al. 2009 <sub>2</sub> (112)     | 0.00 | X |   | X |   |   |   |
| DEP    | Halari et al. 2009 <sub>3</sub> (112)     | 0.00 | X | X |   |   |   |   |
| DEP    | Hall et al. 2014 (113)                    | 0.00 |   |   | X |   |   | X |
| DEP    | Roberson-Nay et al. 2006 (114)            | 0.00 | X |   | X | X |   |   |
| DEP    | Sharp et al. 2014 (115)                   | 0.00 |   |   | X |   | X |   |
| DEP    | Tao et al. 2012 (116)                     | 0.00 |   |   | X |   |   | X |
| DEP    | Yang et al. 2009 (117)                    | 0.00 | X | X |   |   |   |   |
| DEP    | Yang et al. 2010 (118)                    | 0.00 |   |   | X | X |   |   |
| DEP    | Pan et al. 2011 (119)                     | 0.47 | X | X |   |   |   |   |
| DEP    | Pan et al. 2013 (A) (120)                 | 0.67 |   |   | X | X |   |   |
| DEP    | Pan et al. 2013 (B) (120)                 | 0.43 |   |   | X | X |   |   |
| DEP    | Groschwitz et al. 2016 (121)              | 0.36 |   |   | X |   |   | X |
| DEP    | Suzuki et al. 2014 (A) (122)              | NA   |   |   | X |   |   | X |
| DEP    | Suzuki et al. 2014 (B) (122)              | NA   |   |   | X |   |   | X |
| DEP    | De Bellis et Hooper 2013 (123)            | 0.00 | X | X | X |   |   | X |

Note. (A)(B) = distinct samples from the same study. <sub>1,2</sub> = distinct task contrasts or fMRI task from the same study. MED = Medication (in %); COG = Cognitive; RI = Response Inhibition; ATTN = Attention; EMO = Emotional; BOTH = Both Positive and Negative Emotion; POS = Positive; NEG = Negative;



### **Additional information about the Correlation-Matrix Hierarchical Clustering.**

We thus repeated the CMHC for a range of 2 to 15 MAGs. The optimal number of MAGs was determined by comparing frequently used metrics in fMRI clustering (i.e., silhouette and calinski-harabasz indices, variation of information & adjusted rand index) (55), for each of the 2-15 MAGs (See Supplementary Material for more information). More precisely, we used a 90% subsampling resample strategy (without replacement, 5000 iterations). This implied that we randomly removed 10% of experiments, iteratively, to perturbate the ability to group the most correlated experiments with each other, successively. Then, for K range, each metric was compared against a null distribution. To do so, 5,000 datasets were created artificially by shuffling foci locations across experiments but preserving original experiments' properties (e.g., number of foci, sample size). The average of each metric (i.e., silhouette and calinski-harabasz indices) derived from *true* dataset, was normalized using this null distribution ( $Average_{TRUE} - Average_{NULL} / STD_{NULL}$ ) and then plotted for K range (2-15 MAGs). This improves our ability to select the optimal K by taking into account the probabilities of getting a certain metric value in a random spatial arrangement. Given that the ground truth class labels are unknown, we compared, for each K, the consistency (adjusted rand index) and shared information distance (variation of information) between  $Label_{TRUE}$  with the  $Label_{NULL}$  then averaged across the 5000 iterations. These metrics were then plotted for K range. A local minimum in the plot suggests a decrease in overlap between both sets of labels. After finding the optimal number of MAGs, the most stable label solution was found by grouping experiments that were labelled similarly across the 5,000 subsampling iterations. More precisely, we calculated the hamming distance between each experiment's label ids (147 experiments by 5000 iterations ids) to calculate the proportion of disagreement between two experiments' set of labels. A CMHC was performed on a final 147-by-147 experiments'

distance matrix, representing the distance between each pair of experiments. We then used the determined most optimal number of MAGs to extract the most stable label ids.

**Supplementary Figure 1.** Metrics computed for  $K=2$  to 15 clustering solutions. **A.** This line graph represents silhouette (Rousseeuw, 1986) and calinski-harabasz (Calinski et Harabasz, 1974) metrics averaged over 5,000 subsampling iterations and then normalized against a null distribution. Green line = Silhouette metric, Blue line = Calinski-Harabasz metric. **B.** Line graph refers to changes in silhouette and calinski-harabasz values from  $K$  to  $K+1$  (i.e.  $(K+1) - 1$ ). Silhouette metrics (green) show a stable solution at  $k=8$ , while calinski-harabasz metric was monotonic. **C.** Adjusted Rand Indices between  $K_{TRUE} - K_{NULL}$ . This plot shows lowest scores at  $K=3$ ,  $K=8$ . **D.** Variation of Information between  $K_{TRUE} - K_{NULL}$ . Although scores are rather monotonic, greatest increases moving from  $K=2$  to 3,  $K=6$  to  $K=7$  and  $K=7$  to  $K=8$ .

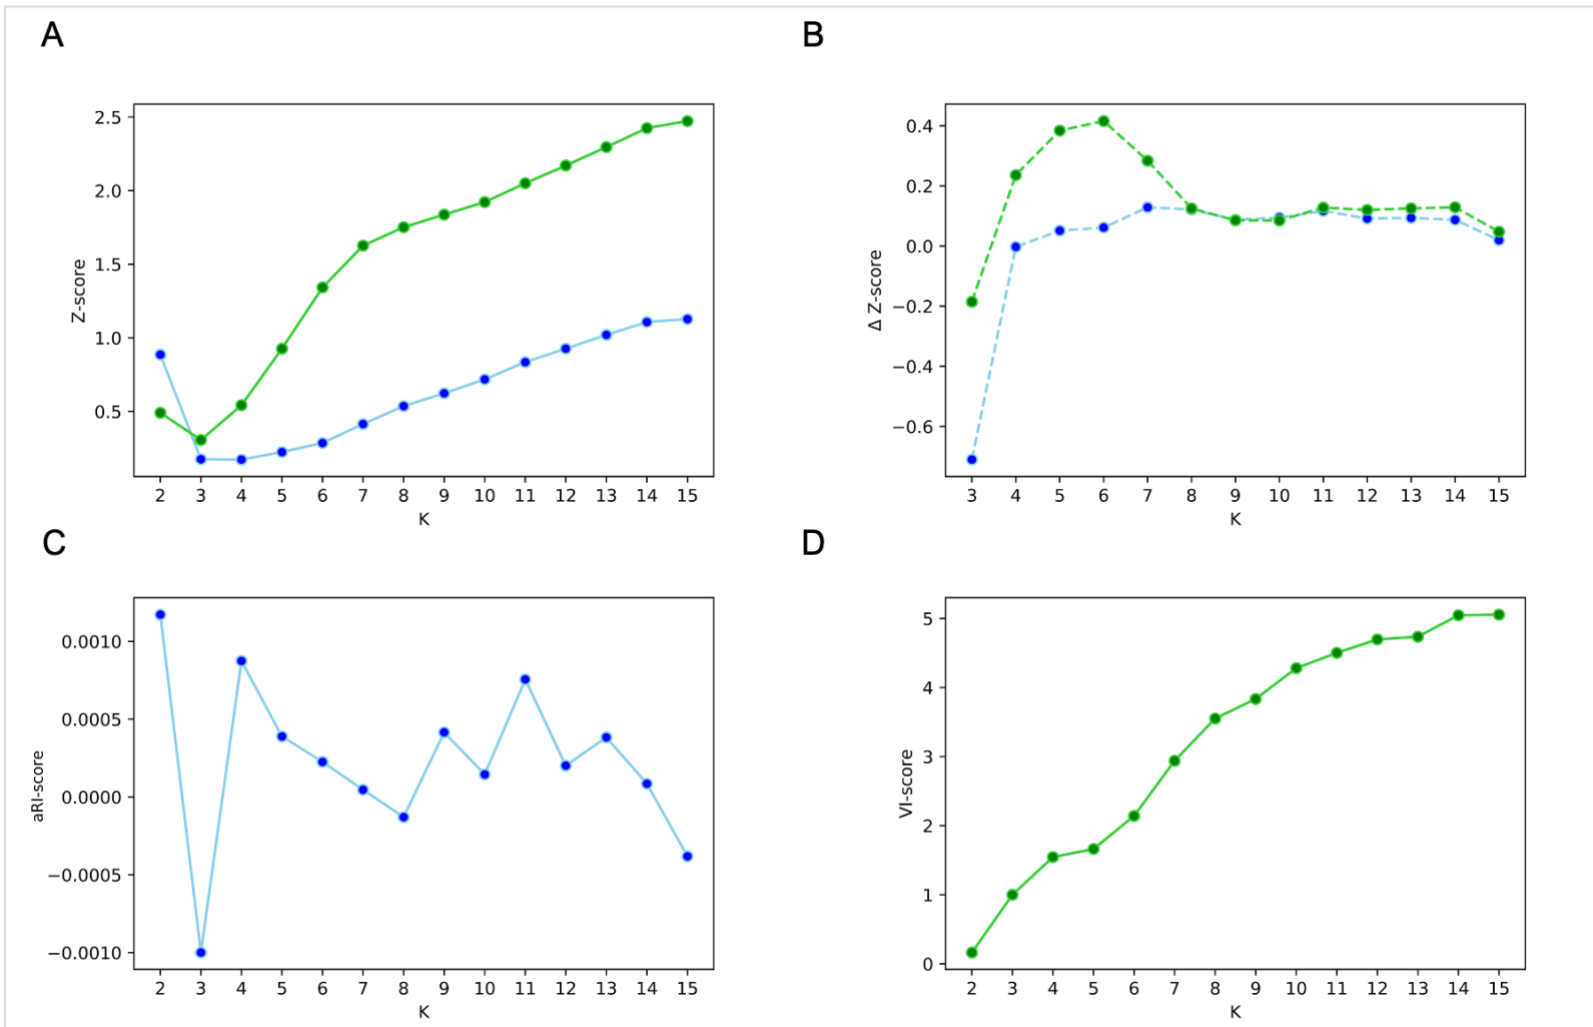

**Supplementary Figure 2.** Z-scores of probabilities of aberrant MAG per disorder class. For each disorder class, z-score was calculated by subtracting the average voxelwise ALE probability (whole brain) from the average ALE probability within MAG divided by the standard deviation of the whole-brain ALE probabilities.

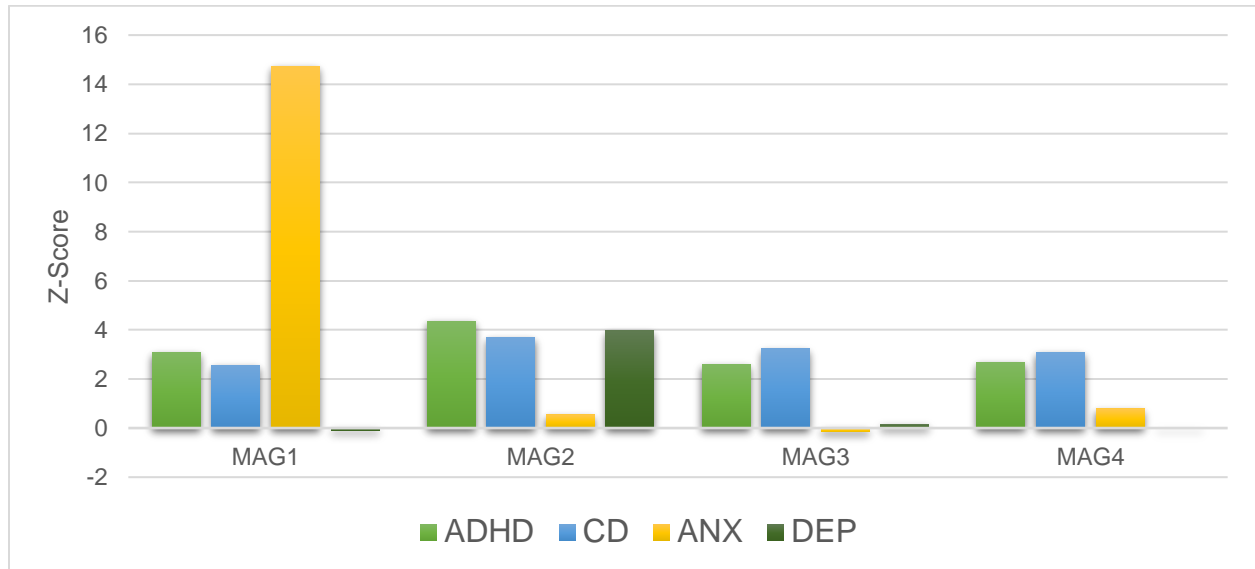

**Supplementary Figure 3.** Results from the forward (classical) ALE meta-analysis. Red cluster = Transdiagnostic Neurobiological Marker when pooling ADHD, CD/ODD, ANX and ADHD ( $x=4$ ,  $y=24$ ,  $z=42$ , ALE score=0.021, 323 voxels). Green Cluster = Externalizing Disorders ( $x=4$ ,  $y=26$ ,  $z=44$ , maximum ALE score=0.0279, 147 voxels); Blue Cluster = Internalizing Disorders ( $x=-8$ ,  $y=38$ ,  $z=8$ , maximum ALE score = 0.0167, 129 voxels).

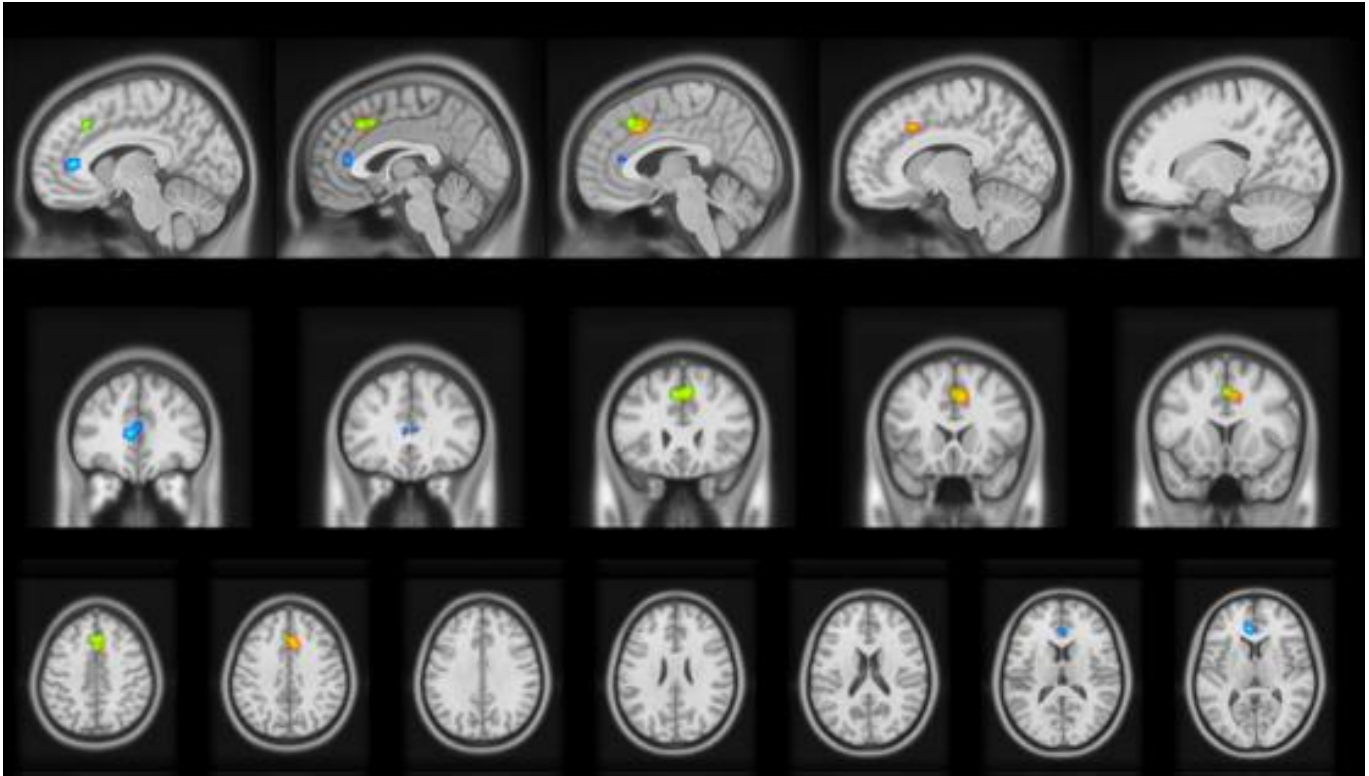

**Supplementary Table 3.** Results from classical meta-analysis on nosological categories

| Diagnosis Category | MNI Coordinates |    |    | ALE    | Cluster Size |
|--------------------|-----------------|----|----|--------|--------------|
|                    | X               | Y  | Z  |        |              |
| <u>ADHD</u>        |                 |    |    |        |              |
| dACC               | -2              | 12 | 22 | 0.0198 | 51           |
| vIPFC (BA47)       | 50              | 14 | -4 | 0.0179 | 35           |
| <u>CD/ODD</u>      |                 |    |    |        |              |
| Caudate            | 12              | 8  | 0  | 0.0118 | 40           |
| pre-SMA            | -6              | 26 | 42 | 0.0113 | 28           |
| <u>ANX</u>         |                 |    |    |        |              |
| N.S.               | -               | -  | -  | -      | -            |
| <u>DEP</u>         |                 |    |    |        |              |
| N.S.               | -               | -  | -  | -      | -            |

*Note.* These results were performed using liberal threshold ( $p=0.001$  uncorrected at a voxel-level). ADHD = Attention deficit hyperactivity disorder; CD/ODD = Conduct Disorder / Oppositional Defiant Disorder; ANX = Anxiety Disorder; DEP = Depressive Disorder. MNI = Montreal Neurological Institute; N.S. = Not Statistically Significant. dACC = dorsal Anterior Cingulate Cortex; vIPFC = ventrolateral Prefrontal Cortex; pre-SMA = pre-Supplementary Motor Area.

#### **Supplementary Table 4.** List of fMRI tasks per MAGs.

##### **MAG1**

---

N-Back  
Go-No/Go  
Go-No/Go  
Reversal Learning Task  
Rewarded Go-No/Go  
Rewarded Stroop Task  
Response Inhibition Task  
Stop Task  
Simon Task  
Go-No/Go  
Spatial span task  
monetary incentive delay task  
Emotional face probe detection task  
Continuous Performance Task with emotional distractors  
face-attention paradigm  
Colorado Balloon Game  
Colorado Balloon Game  
Probabilistic Reversal Task  
Monetary Incentive task  
Simon Task  
Probabilistic Reversal Task

##### **MAG2**

---

Go-No/Go  
Spatial Working Memory Task  
Go-No/Go  
Cued Target Detection  
Stroop Task  
Continuous Performance Task  
Sustained Attention Task  
Go-No/Go  
Stroop Task  
Stop Task  
Speeded Flanker Task  
Speeded Flanker Task  
Stop-Signal Task  
Attention Network Test  
Recognition Test  
N-Back  
N-Back  
Spatial Attention Paradigm  
Sustained Attention Task  
Iowa Gambling Task  
Visual Search Task  
Auditory Oddball Attention Task  
N-Back  
Emotional Valence Stroop Task  
Subliminal Presentation of Fearful Faces  
Emotional Stroop Task  
Visual-Spatial Switch Task  
Stop Task  
Switch Task  
Raven's Progressive Matrices Task  
Go/NoGo  
Time Discrimination  
Monetary incentive delay task  
Monetary incentive delay task  
Monetary incentive delay task

monetary incentive delay task  
Go-No/Go  
Stop-Signal Task  
Continuous Performance Task  
Passive-Viewing Emotional Face Task  
Emotional Face visual probe task  
Valence Evaluation Task  
Emotional Conflict Task  
Emotional Face Task  
Reward Continuous Performance Task  
modified affective Go/No-Go  
Being-Liked Task (Emotional Face)  
emotional facial expression gender labeling task  
Go/No-Go  
Simon Task  
Stop Task  
Emotional Faces Task  
Emotional Face Task: Encoding  
Modified card-guessing game (monetary reward)  
Emotional Face Task (gender labelling)  
Parametric inhibitory task (Stop task)  
facial-emotion matching task  
Go/No-Go task  
Iowa Gambling Task  
Iowa Gambling Task  
Emotional Perception  
Go-No/Go  
Dynamic Face Task  
Emotional oddball task  
Emotional oddball task  
Cyberball Task  
Stop-Signal Task  
GoStop Task  
Stroop Task  
Monetary Incentive Delay (MID) task  
Point Subtraction Aggression Game  
Point Subtraction Aggression Game  
Affective Stroop Task  
Passive-Viewing Emotional Stimuli Task  
Affective Stroop Task  
Affective Stroop Task  
Empathic Emotional Face Task  
Dictator Game  
Empathic Situation of Pain Task  
Emotional Face Task  
Emotional Face Task  
Monetary gambling task  
Animacy Attention Task  
Passive Avoidance Task  
Passive Avoidance Task  
GoStop Task  
Stroop Task

### **MAG3**

---

N-Back  
Finger Sequencing Paradigm  
Stop Task  
Simon Task  
Anti-Saccade and Fixation Trials  
Match-to-Sample Task  
Oddball Task  
Mental Rotation Task



Facial Emotion Viewing Task  
Stop Task  
Visual–Spatial Switch Task  
Eye Gaze Task  
Doors Task

#### **MAG4**

---

Go-No/Go  
Stop Task  
Stroop Paradigm  
Go-No/Go  
Pictures Story  
Reward Continuous Performance Task  
Fluid Reasoning Task  
Visual Oddball Task  
Threat conditioning  
Emotional Face Task  
Implicit Association Test (words)  
Rewarded Continuous Performance Test (CPT)

Supplementary Phenotype Assessment: Literature Bias & Subanalyses

We tested if fMRI literature showed differences between nosological categories regarding the choice of neurocognitive task domains, average of sex ratio, and the average of prescribed medication per samples. Literature showed significant differences in cognitive tasks ( $X_2=23.75$ ,  $p<0.001$ ), general emotional tasks ( $X_2=42.11$ ,  $p<0.001$ ) but more specifically in tasks using simultaneously positive and negative stimuli ( $X_2=7.85$ ,  $p=0.049$ ) and negative stimuli only ( $X_2=53.69$ ,  $p<0.001$ ). Biases were also observed in the average of sex ratio ( $X_2=64.69$ ,  $p<0.001$ ) and the average of sample with prescribed medication ( $X_2=18.02$ ,  $p<0.001$ ).

Given that these factors may alter the relationships between nosological categories and MAGs, further analyses were performed by restricting experiments using specific cognitive task contrasts, emotional task contrasts, medication naïve and mixed sex samples. Subanalyses on emotion-specific stimuli (e.g., positive, negative or both) could not be performed due to the limited sample size across MAGs. First, the lower rates of DEP samples across MAG1 compared to other MAGs was only replicated when restricting experiments to those using an emotional task contrast ( $X_2=4.34$ ,  $p=0.037$ ) and a mixed sex samples ( $X_2=3.89$ ,  $p=0.049$ ). Furthermore, MAG1 had higher rates of ADHD samples in experiments with an emotional task contrast ( $X_2=3.18$ ,  $p=0.050$ ).

Finally, the relationship between MAG2 and DEP samples was replicated when restricting experiments to those using a cognitive task contrast ( $X_2=5.53$ ,  $p=0.019$ ), an emotional task contrast ( $X_2=5.22$ ,  $p=0.022$ ), but also in experiments with only medication naïve sample ( $X_2=5.70$ ,  $p=0.017$ ) and in mixed sex samples ( $X_2=7.54$ ,  $p=0.006$ ).

**Supplementary Table 5.** Disorder-specific sample and task characteristics

| Characteristics                    | ADHD        | CD/ODD      | ANX         | DEP          |
|------------------------------------|-------------|-------------|-------------|--------------|
| <i>Task-domain</i>                 |             |             |             |              |
| Cognitive                          | 60 (75.9%)  | 15 (46.9%)  | 2 (14.3%)   | 11 (50.0%)   |
| RI                                 | 29 (36.7%)  | 8 (25%)     | 1 (7.1%)    | 6 (27.3%)    |
| Attention                          | 14 (17.7%)  | 4 (12.5%)   | 1 (7.1%)    | 4 (18.2%)    |
| Emotion                            | 19 (24.1%)  | 23 (71.9%)  | 13 (92.9%)  | 16 (72.7%)   |
| Positive                           | 10 (12.7%)  | 4 (12.5%)   | 0 (0%)      | 3 (13.6%)    |
| Negative                           | 3 (3.8%)    | 17 (53.1%)  | 11 (78.6%)  | 6 (27.3%)    |
| Both                               | 6 (7.6%)    | 2 (6.3%)    | 2 (14.3%)   | 6 (27.3%)    |
| <i>Sample</i>                      |             |             |             |              |
| Average Med per sample (Mean, SD)  | 35.5 (33.9) | 21.5 (23.7) | 0           | 19.26 (25.0) |
| Average Boys per Sample (Mean, SD) | 82.2 (21.4) | 81.4 (27.3) | 44.4 (14.7) | 37.5 (15.2)  |

Note. RI = Response Inhibition; Both = Both Positive and Negative Emotional Stimuli; Med = Medication

**Supplementary Table 6.** Disorder-specific comorbidities

| Primary Diagnosis | Comorbidities |             |        |             |     |             |     |            |
|-------------------|---------------|-------------|--------|-------------|-----|-------------|-----|------------|
|                   | ADHD          |             | CD/ODD |             | ANX |             | DEP |            |
|                   | n             | mean %      | n      | mean %      | n   | mean %      | n   | mean %     |
| ADHD (n=79)       | -             | -           | 65     | 14.4 (16.3) | 64  | 1.7 (4.6)   | 65  | 1.2 (4.7)  |
| CD/ODD (n=32)     | 29            | 33.4 (24.1) | -      | -           | 31  | 1.0 (3.1)   | 31  | 5.9 (19.6) |
| ANX (n=14)        | 6             | 10.5 (15.6) | 10     | 6.7 (14.9)  | -   | -           | 12  | 12 (28.2)  |
| DEP (n=22)        | 20            | 7.2 (9.0)   | 20     | 4.1 (8.8)   | 21  | 23.6 (27.1) | -   | -          |

Note. *n* = the number of samples with available data.

**Supplementary Table 7.** Disorder-specific comorbidities per MAGs

| Characteristics              | MAG1 (k=21) |        | MAG2 (k=87) |        | MAG3 (k=13) |       | MAG4 (k=12) |        |
|------------------------------|-------------|--------|-------------|--------|-------------|-------|-------------|--------|
|                              | n           | %      | n           | %      | n           | %     | n           | %      |
| <b><u>ADHD samples</u></b>   |             |        |             |        |             |       |             |        |
| ANX                          | 12          | 3.33%  | 32          | 1.53%  | 8           | 1.13% | 7           | 1.14%  |
| DEP                          | 11          | 3.46%  | 34          | 0.65%  | 8           | 2.25% | 7           | 0%     |
| CD/ODD                       | 12          | 23.58% | 33          | 15.50% | 8           | 6.63% | 7           | 5.14%  |
| <b><u>ANX samples</u></b>    |             |        |             |        |             |       |             |        |
| ADHD                         | 0           | 0%     | 4           | 4.50%  | 0           | 0%    | 1           | 4%     |
| DEP                          | 2           | 46.50% | 8           | 18.13% | 0           | 0%    | 1           | 0%     |
| CD/ODD                       | 2           | 0%     | 6           | 2.50%  | 0           | 0%    | 1           | 4%     |
| <b><u>DEP samples</u></b>    |             |        |             |        |             |       |             |        |
| ADHD                         | 0           | 0%     | 16          | 6.75%  | 1           | 13%   | 0           | 0%     |
| ANX                          | 0           | 0%     | 18          | 24.50% | 1           | 30%   | 0           | 0%     |
| CD/ODD                       | 0           | 0%     | 16          | 2.06%  | 1           | 17%   | 0           | 0%     |
| <b><u>CD/ODD samples</u></b> |             |        |             |        |             |       |             |        |
| ADHD                         | 2           | 33.50% | 16          | 36.19% | 4           | 25%   | 3           | 26.30% |
| ANX                          | 4           | 0%     | 16          | 1.25%  | 4           | 0%    | 3           | 1.67%  |
| DEP                          | 4           | 0%     | 16          | 1.69%  | 4           | 0%    | 3           | 15%    |

*Note.* *n* = the number of samples with available data. The only analyses were performed in samples with ADHD and revealed marginally significant differences between MAGs relatively to comorbidities with CD/ODD ( $H=7.11$ ,  $p=0.068$ ). Post-hoc tests suggested that in ADHD samples, rate of CD/ODD comorbidity was higher in MAG1 compared to MAG3 ( $p=0.012$ ) and MAG4 ( $p=0.011$ ) but not compared to MAG2 ( $p=0.142$ ). No differences were observed for ANX or DEP comorbidities in ADHD samples

### Disorder-Specific ALE Meta-analyses

Meta-analyses were performed across all foci, independently of the activation direction, for ANX (46 foci, 14 experiments, 293 subjects), DEP (103 foci, 22 experiments, 388 subjects), ADHD (700 foci, 79 experiments, 1892 subjects) and CD (197 foci, 32 experiments, 626 subjects). However, each disorder-specific meta-analysis revealed no significant spatial convergence (See Supplementary Material for results using uncorrected threshold). Nonetheless, we observed peak convergence in dorsal/perigenual ACC (MNI  $x=-8$ ,  $y=38$ ,  $z=8$ , maximum ALE score = 0.0167, 129 voxels) for the internalizing category (ANX+DEP) and pre-SMA ( $x=4$ ,  $y=26$ ,  $z=44$ , maximum ALE score=0.0279, 147 voxels) for the externalizing category (ADHD+CD/ODD). Additionally, merging experiments across pediatric psychiatric disorders, we observed a significant cluster that included voxels of the right anterior MCC and the pre-supplementary motor area ( $x=4$ ,  $y=24$ ,  $z=42$ , ALE score=0.021, 323 voxels). Despite the fact that ADHD (57.14%) and CD/ODD (35.71%) largely contributed to this specific brain region, proportions did not significantly differ from their respective base rate. Furthermore, no significant differences were observed regarding nosological categories nor task-characteristics. However, Mann-Whitney U revealed a significant sex effect, indicating that the aMCC/pre-SMA may be associated with higher average rates of boys across samples ( $M=69.7\%$  versus  $M=91.77\%$ ;  $U=479.0$ ;  $p=0.003$ ). No other significant differences were observed.

## **REFERENCES**

1. Braet W, Johnson KA, Tobin CT, Acheson R, McDonnell C, Hawi Z, et al. (2011): fMRI activation during response inhibition and error processing: the role of the DAT1 gene in typically developing adolescents and those diagnosed with ADHD. *Neuropsychologia*. 49:1641-1650.
2. Bédard A-CV, Newcorn JH, Clerkin SM, Krone B, Fan J, Halperin JM, et al. (2014): Reduced prefrontal efficiency for visuospatial working memory in attention-deficit/hyperactivity disorder. *Journal of the American Academy of Child & Adolescent Psychiatry*. 53:1020-1030. e1026.
3. Bollmann S, Ghisleni C, Poil S-S, Martin E, Ball J, Eich-Höchli D, et al. (2017): Age-dependent and-independent changes in attention-deficit/hyperactivity disorder (ADHD) during spatial working memory performance. *The World Journal of Biological Psychiatry*. 18:279-290.
4. Booth JR, Burman DD, Meyer JR, Lei Z, Trommer BL, Davenport ND, et al. (2005): Larger deficits in brain networks for response inhibition than for visual selective attention in attention deficit hyperactivity disorder (ADHD). *Journal of Child Psychology and Psychiatry*. 46:94-111.
5. Cao Q, Zang Y, Zhu C, Cao X, Sun L, Zhou X, et al. (2008): Alerting deficits in children with attention deficit/hyperactivity disorder: event-related fMRI evidence. *Brain research*. 1219:159-168.
6. Cerullo MA, Adler CM, Lamy M, Eliassen JC, Fleck DE, Strakowski SM, et al. (2009): Differential brain activation during response inhibition in bipolar and attention-deficit hyperactivity disorders. *Early intervention in psychiatry*. 3:189-197.
7. Chou T-L, Chia S, Shang C-Y, Gau SS-F (2015): Differential therapeutic effects of 12-week treatment of atomoxetine and methylphenidate on drug-naive children with attention deficit/hyperactivity disorder: A counting Stroop functional MRI study. *European Neuropsychopharmacology*. 25:2300-2310.
8. Christakou A, Murphy C, Chantiluke K, Cubillo A, Smith A, Giampietro V, et al. (2013): Disorder-specific functional abnormalities during sustained attention in youth with attention deficit hyperactivity disorder (ADHD) and with autism. *Molecular psychiatry*. 18:236-244.
9. Durston S, Mulder M, Casey B, Ziermans T, van Engeland H (2006): Activation in ventral prefrontal cortex is sensitive to genetic vulnerability for attention-deficit hyperactivity disorder. *Biological psychiatry*. 60:1062-1070.
10. Durston S, Davidson MC, Mulder MJ, Spicer JA, Galvan A, Tottenham N, et al. (2007): Neural and behavioral correlates of expectancy violations in attention-deficit hyperactivity disorder. *Journal of Child Psychology and Psychiatry*. 48:881-889.
11. Ercan ES, Suren S, Bacanlı A, Yazici KU, Callı C, Ozyurt O, et al. (2016): Decreasing ADHD phenotypic heterogeneity: searching for neurobiological underpinnings of the restrictive inattentive phenotype. *European child & adolescent psychiatry*. 25:273-282.
12. Fan L, Gau SS, Chou T (2014): Neural correlates of inhibitory control and visual processing in youths with attention deficit hyperactivity disorder: a counting Stroop functional MRI study. *Psychological Medicine*. 44:2661.
13. Hart H, Marquand AF, Smith A, Cubillo A, Simmons A, Brammer M, et al. (2014): Predictive neurofunctional markers of attention-deficit/hyperactivity disorder based on pattern classification of temporal processing. *Journal of the American Academy of Child & Adolescent Psychiatry*. 53:569-578. e561.

14. Hart H, Chantiluke K, Cubillo AI, Smith AB, Simmons A, Brammer MJ, et al. (2014): Pattern classification of response inhibition in ADHD: toward the development of neurobiological markers for ADHD. *Human Brain Mapping*. 35:3083-3094.
15. Hauser TU, Iannaccone R, Ball J, Mathys C, Brandeis D, Walitza S, et al. (2014): Role of the medial prefrontal cortex in impaired decision making in juvenile attention-deficit/hyperactivity disorder. *JAMA psychiatry*. 71:1165-1173.
16. Hwang S, White SF, Nolan ZT, Williams WC, Sinclair S, Blair R (2015): Executive attention control and emotional responding in attention-deficit/hyperactivity disorder—A functional MRI study. *NeuroImage: Clinical*. 9:545-554.
17. Iannaccone R, Hauser TU, Ball J, Brandeis D, Walitza S, Brem S (2015): Classifying adolescent attention-deficit/hyperactivity disorder (ADHD) based on functional and structural imaging. *European child & adolescent psychiatry*. 24:1279-1289.
18. Janssen TW, Heslenfeld DJ, van Mourik R, Logan GD, Oosterlaan J (2015): Neural correlates of response inhibition in children with attention-deficit/hyperactivity disorder: A controlled version of the stop-signal task. *Psychiatry Research: Neuroimaging*. 233:278-284.
19. Kohls G, Thönessen H, Bartley GK, Grossheinrich N, Fink GR, Herpertz-Dahlmann B, et al. (2014): Differentiating neural reward responsiveness in autism versus ADHD. *Developmental cognitive neuroscience*. 10:104-116.
20. Konrad K, Neufang S, Hanisch C, Fink GR, Herpertz-Dahlmann B (2006): Dysfunctional attentional networks in children with attention deficit/hyperactivity disorder: evidence from an event-related functional magnetic resonance imaging study. *Biological psychiatry*. 59:643-651.
21. Krauel K, Duzel E, Hinrichs H, Santel S, Rellum T, Baving L (2007): Impact of emotional salience on episodic memory in attention-deficit/hyperactivity disorder: a functional magnetic resonance imaging study. *Biological Psychiatry*. 61:1370-1379.
22. Li Y, Li F, He N, Guo L, Huang X, Lui S, et al. (2014): Neural hyperactivity related to working memory in drug-naïve boys with attention deficit hyperactivity disorder. *Progress in Neuro-Psychopharmacology and Biological Psychiatry*. 53:116-122.
23. Ma J, Lei D, Jin X, Du X, Jiang F, Li F, et al. (2012): Compensatory brain activation in children with attention deficit/hyperactivity disorder during a simplified Go/No-go task. *Journal of neural transmission*. 119:613-619.
24. Ma I, van Holstein M, Mies GW, Mennes M, Buitelaar J, Cools R, et al. (2016): Ventral striatal hyperconnectivity during rewarded interference control in adolescents with ADHD. *Cortex*. 82:225-236.
25. Massat I, Slama H, Kavec M, Linotte S, Mary A, Baleriaux D, et al. (2012): Working memory-related functional brain patterns in never medicated children with ADHD. *PloS one*. 7:e49392.
26. Massat I, Slama H, Villemonteix T, Mary A, Baijot S, Albajara Sáenz A, et al. (2018): Hyperactivity in motor response inhibition networks in unmedicated children with attention deficit-hyperactivity disorder. *The World Journal of Biological Psychiatry*. 19:101-111.
27. Metin B, Tas ZC, Çebi M, Büyükaslan A, Soysal A, Hatiloglu D, et al. (2018): Reward processing deficits during a spatial attention task in patients with ADHD: an fMRI study. *Journal of attention disorders*. 22:694-702.
28. Mostofsky SH, Rimrodt SL, Schafer JG, Boyce A, Goldberg MC, Pekar JJ, et al. (2006): Atypical motor and sensory cortex activation in attention-deficit/hyperactivity disorder: a functional magnetic resonance imaging study of simple sequential finger tapping. *Biological psychiatry*. 59:48-56.

29. Norman LJ, Carlisi CO, Christakou A, Cubillo A, Murphy CM, Chantiluke K, et al. (2017): Shared and disorder-specific task-positive and default mode network dysfunctions during sustained attention in paediatric Attention-Deficit/Hyperactivity Disorder and obsessive/compulsive disorder. *NeuroImage: Clinical*. 15:181-193.
30. Norman LJ, Carlisi CO, Christakou A, Murphy CM, Chantiluke K, Giampietro V, et al. (2018): Frontostriatal dysfunction during decision making in attention-deficit/hyperactivity disorder and obsessive-compulsive disorder. *Biological Psychiatry: Cognitive Neuroscience and Neuroimaging*. 3:694-703.
31. O'Conaill CR, Malisza KL, Buss JL, Bolster RB, Clancy C, de Gervai PD, et al. (2015): Visual search for feature conjunctions: an fMRI study comparing alcohol-related neurodevelopmental disorder (ARND) to ADHD. *Journal of neurodevelopmental disorders*. 7:1-18.
32. Orinstein AJ, Stevens MC (2014): Brain activity in predominantly-inattentive subtype attention-deficit/hyperactivity disorder during an auditory oddball attention task. *Psychiatry Research: Neuroimaging*. 223:121-128.
33. Passarotti AM, Sweeney JA, Pavuluri MN (2010): Emotion processing influences working memory circuits in pediatric bipolar disorder and attention-deficit/hyperactivity disorder. *Journal of the American Academy of Child & Adolescent Psychiatry*. 49:1064-1080.
34. Passarotti AM, Sweeney JA, Pavuluri MN (2010): Differential engagement of cognitive and affective neural systems in pediatric bipolar disorder and attention deficit hyperactivity disorder. *Journal of the International Neuropsychological Society: JINS*. 16:106.
35. Passarotti AM, Sweeney JA, Pavuluri MN (2010): Neural correlates of response inhibition in pediatric bipolar disorder and attention deficit hyperactivity disorder. *Psychiatry Research: Neuroimaging*. 181:36-43.
36. Poissant H, Rapin L, Chenail S, Mendrek A (2016): Forethought in youth with attention deficit/hyperactivity disorder: An FMRI study of sex-specific differences. *Psychiatry journal*. 2016.
37. Posner J, Nagel BJ, Maia TV, Mechling A, Oh M, Wang Z, et al. (2011): Abnormal amygdalar activation and connectivity in adolescents with attention-deficit/hyperactivity disorder. *Journal of the American Academy of Child & Adolescent Psychiatry*. 50:828-837. e823.
38. Posner J, Maia TV, Fair D, Peterson BS, Sonuga-Barke EJ, Nagel BJ (2011): The attenuation of dysfunctional emotional processing with stimulant medication: an fMRI study of adolescents with ADHD. *Psychiatry Research: Neuroimaging*. 193:151-160.
39. Rubia K, Smith AB, Brammer MJ, Toone B, Taylor E (2005): Abnormal brain activation during inhibition and error detection in medication-naive adolescents with ADHD. *American Journal of Psychiatry*. 162:1067-1075.
40. Rubia K, Halari R, Smith AB, Mohammed M, Scott S, Giampietro V, et al. (2008): Dissociated functional brain abnormalities of inhibition in boys with pure conduct disorder and in boys with pure attention deficit hyperactivity disorder. *American Journal of Psychiatry*. 165:889-897.
41. Rubia K, Smith AB, Halari R, Matsukura F, Mohammad M, Taylor E, et al. (2009): Disorder-specific dissociation of orbitofrontal dysfunction in boys with pure conduct disorder during reward and ventrolateral prefrontal dysfunction in boys with pure ADHD during sustained attention. *American Journal of Psychiatry*. 166:83-94.
42. Rubia K, Halari R, Smith AB, Mohammad M, Scott S, Brammer MJ (2009): Shared and disorder-specific prefrontal abnormalities in boys with pure attention-deficit/hyperactivity



disorder compared to boys with pure CD during interference inhibition and attention allocation. *Journal of Child Psychology and Psychiatry*. 50:669-678.

43. Rubia K, Halari R, Christakou A, Taylor E (2009): Impulsiveness as a timing disturbance: neurocognitive abnormalities in attention-deficit hyperactivity disorder during temporal processes and normalization with methylphenidate. *Philosophical Transactions of the Royal Society B: Biological Sciences*. 364:1919-1931.

44. Rubia K, Halari R, Cubillo A, Mohammad AM, Scott S, Brammer M (2010): Disorder-specific inferior prefrontal hypofunction in boys with pure attention-deficit/hyperactivity disorder compared to boys with pure conduct disorder during cognitive flexibility. *Human Brain Mapping*. 31:1823-1833.

45. Rubia K, Cubillo A, Smith AB, Woolley J, Heyman I, Brammer MJ (2010): Disorder-specific dysfunction in right inferior prefrontal cortex during two inhibition tasks in boys with attention-deficit hyperactivity disorder compared to boys with obsessive-compulsive disorder. *Human brain mapping*. 31:287-299.

46. Rubia K, Cubillo A, Woolley J, Brammer MJ, Smith A (2011): Disorder-specific dysfunctions in patients with attention-deficit/hyperactivity disorder compared to patients with obsessive-compulsive disorder during interference inhibition and attention allocation. *Human brain mapping*. 32:601-611.

47. Schwarz NF, Krafft CE, Chi L, Weinberger AL, Schaeffer DJ, Pierce JE, et al. (2015): Antisaccade-related brain activation in children with attention-deficit/hyperactivity disorder—A pilot study. *Psychiatry Research: Neuroimaging*. 234:272-279.

48. Sheridan MA, Hinshaw S, D'ESPOSITO M (2007): Efficiency of the prefrontal cortex during working memory in attention-deficit/hyperactivity disorder. *Journal of the American Academy of Child & Adolescent Psychiatry*. 46:1357-1366.

49. Silk TJ, Vance A, Rinehart N, Bradshaw JL, Cunnington R (2008): Dysfunction in the fronto-parietal network in attention deficit hyperactivity disorder (ADHD): an fMRI study. *Brain Imaging and Behavior*. 2:123-131.

50. Siniatchkin M, Glatthaar N, von Müller GG, Prehn-Kristensen A, Wolff S, Knöchel S, et al. (2012): Behavioural treatment increases activity in the cognitive neuronal networks in children with attention deficit/hyperactivity disorder. *Brain topography*. 25:332-344.

51. Smith AB, Taylor E, Brammer M, Halari R, Rubia K (2008): Reduced activation in right lateral prefrontal cortex and anterior cingulate gyrus in medication-naïve adolescents with attention deficit hyperactivity disorder during time discrimination. *Journal of Child Psychology and Psychiatry*. 49:977-985.

52. Spinelli S, Joel S, Nelson TE, Vasa RA, Pekar JJ, Mostofsky SH (2011): Different neural patterns are associated with trials preceding inhibitory errors in children with and without attention-deficit/hyperactivity disorder. *Journal of the American Academy of Child & Adolescent Psychiatry*. 50:705-715. e703.

53. Spinelli S, Vasa RA, Joel S, Nelson TE, Pekar JJ, Mostofsky SH (2011): Variability in post-error behavioral adjustment is associated with functional abnormalities in the temporal cortex in children with ADHD. *Journal of Child Psychology and Psychiatry*. 52:808-816.

54. Stevens MC, Pearlson GD, Calhoun VD, Bessette KL (2018): Functional neuroimaging evidence for distinct neurobiological pathways in attention-deficit/hyperactivity disorder. *Biological Psychiatry: Cognitive Neuroscience and Neuroimaging*. 3:675-685.

55. Tamm L, Menon V, Ringel J, Reiss AL (2004): Event-related FMRI evidence of frontotemporal involvement in aberrant response inhibition and task switching in attention-

deficit/hyperactivity disorder. *Journal of the American Academy of Child & Adolescent Psychiatry*. 43:1430-1440.

56. Tamm L, Menon V, Reiss AL (2006): Parietal attentional system aberrations during target detection in adolescents with attention deficit hyperactivity disorder: event-related fMRI evidence. *American Journal of Psychiatry*. 163:1033-1043.

57. Tamm L, Juranek J (2012): Fluid reasoning deficits in children with ADHD: Evidence from fMRI. *Brain research*. 1465:48-56.

58. Tegelbeckers J, Bunzeck N, Duzel E, Bonath B, Flechtner HH, Krauel K (2015): Altered salience processing in attention deficit hyperactivity disorder. *Human brain mapping*. 36:2049-2060.

59. Vance A, Silk T, Casey M, Rinehart NJ, Bradshaw JL, Bellgrove MA, et al. (2007): Right parietal dysfunction in children with attention deficit hyperactivity disorder, combined type: a functional MRI study. *Molecular psychiatry*. 12:826-832.

60. van Ewijk H, Weeda WD, Heslenfeld DJ, Luman M, Hartman CA, Hoekstra PJ, et al. (2015): Neural correlates of visuospatial working memory in attention-deficit/hyperactivity disorder and healthy controls. *Psychiatry Research: Neuroimaging*. 233:233-242.

61. van Rooij D, Hoekstra PJ, Mennes M, von Rhein D, Thissen AJ, Heslenfeld D, et al. (2015): Distinguishing adolescents with ADHD from their unaffected siblings and healthy comparison subjects by neural activation patterns during response inhibition. *American Journal of Psychiatry*. 172:674-683.

62. Vetter NC, Buse J, Backhausen LL, Rubia K, Smolka MN, Roessner V (2018): Anterior insula hyperactivation in ADHD when faced with distracting negative stimuli. *Human brain mapping*. 39:2972-2986.

63. Vloet TD, Gilsbach S, Neufang S, Fink GR, Herpertz-Dahlmann B, Konrad K (2010): Neural mechanisms of interference control and time discrimination in attention-deficit/hyperactivity disorder. *Journal of the American Academy of Child & Adolescent Psychiatry*. 49:356-367.

64. von Rhein D, Cools R, Zwiers MP, van der Schaaf M, Franke B, Luman M, et al. (2015): Increased neural responses to reward in adolescents and young adults with attention-deficit/hyperactivity disorder and their unaffected siblings. *Journal of the American Academy of Child & Adolescent Psychiatry*. 54:394-402.

65. Wang S, Yang Y, Xing W, Chen J, Liu C, Luo X (2013): Altered neural circuits related to sustained attention and executive control in children with ADHD: an event-related fMRI study. *Clinical Neurophysiology*. 124:2181-2190.

66. Hegarty CE, Gupta MW, Miller E, Terashima K, Loo S, McCracken J, et al. (2019): Symptom severity in youths with attention deficit hyperactivity disorder associated with normalizing effects of treatment on fMRI response during a stop signal task. *bioRxiv*.599803.

67. Finger EC, Marsh AA, Mitchell DG, Reid ME, Sims C, Budhani S, et al. (2008): Abnormal ventromedial prefrontal cortex function in children with psychopathic traits during reversal learning. *Archives of general psychiatry*. 65:586-594.

68. Gatzke-Kopp LM, Beauchaine TP, Shannon KE, Chipman J, Fleming AP, Crowell SE, et al. (2009): Neurological correlates of reward responding in adolescents with and without externalizing behavior disorders. *Journal of abnormal psychology*. 118:203.

69. Bubenzer-Busch S, Herpertz-Dahlmann B, Kuzmanovic B, Gaber T, Helmbold K, Ullisch M, et al. (2016): Neural correlates of reactive aggression in children with attention-

deficit/hyperactivity disorder and comorbid disruptive behaviour disorders. *Acta Psychiatrica Scandinavica*. 133:310-323.

70. Banich MT, Crowley TJ, Thompson LL, Jacobson BL, Liu X, Raymond KM, et al. (2007): Brain activation during the Stroop task in adolescents with severe substance and conduct problems: A pilot study. *Drug and Alcohol Dependence*. 90:175-182.

71. Bjork JM, Chen G, Smith AR, Hommer DW (2010): Incentive-elicited mesolimbic activation and externalizing symptomatology in adolescents. *Journal of Child Psychology and Psychiatry*. 51:827-837.

72. Crowley TJ, Dalwani MS, Mikulich-Gilbertson SK, Du YP, Lejuez CW, Raymond KM, et al. (2010): Risky decisions and their consequences: neural processing by boys with antisocial substance disorder. *PloS one*. 5:e12835.

73. Dong D, Ming Q, Wang X, Yu W, Jiang Y, Wu Q, et al. (2017): Temporoparietal junction hypoactivity during pain-related empathy processing in adolescents with conduct disorder. *Frontiers in psychology*. 7:2085.

74. Fairchild G, Baker E, Eaton S (2018): Hypothalamic-pituitary-adrenal axis function in children and adults with severe antisocial behavior and the impact of early adversity. *Current psychiatry reports*. 20:84.

75. Fehlbaum LV, Raschle NM, Menks WM, Prätzlich M, Flemming E, Wyss L, et al. (2018): Altered neuronal responses during an affective Stroop task in adolescents with conduct disorder. *Frontiers in psychology*. 9:1961.

76. Finger EC, Marsh AA, Blair KS, Reid ME, Sims C, Ng P, et al. (2011): Disrupted reinforcement signaling in the orbitofrontal cortex and caudate in youths with conduct disorder or oppositional defiant disorder and a high level of psychopathic traits. *American Journal of Psychiatry*. 168:152-162.

77. Herpertz SC, Huebner T, Marx I, Vloet TD, Fink GR, Stoecker T, et al. (2008): Emotional processing in male adolescents with childhood-onset conduct disorder. *Journal of Child Psychology and Psychiatry*. 49:781-791.

78. Hwang S, Nolan ZT, White SF, Williams WC, Sinclair S, Blair R (2016): Dual neurocircuitry dysfunctions in disruptive behavior disorders: emotional responding and response inhibition. *Psychological medicine*. 46:1485-1496.

79. Klapwijk ET, Aghajani M, Colins OF, Marijnissen GM, Popma A, van Lang ND, et al. (2016): Different brain responses during empathy in autism spectrum disorders versus conduct disorder and callous-unemotional traits. *Journal of Child Psychology and Psychiatry*. 57:737-747.

80. Klapwijk ET, Lelieveld G-J, Aghajani M, Boon AE, van der Wee NJ, Popma A, et al. (2016): Fairness decisions in response to emotions: a functional MRI study among criminal justice-involved boys with conduct disorder. *Social cognitive and affective neuroscience*. 11:674-682.

81. Marsh AA, Finger EC, Fowler KA, Jurkowitz IT, Schechter JC, Henry HY, et al. (2011): Reduced amygdala-orbitofrontal connectivity during moral judgments in youths with disruptive behavior disorders and psychopathic traits. *Psychiatry Research: Neuroimaging*. 194:279-286.

82. Marsh AA, Finger EC, Fowler KA, Adalio CJ, Jurkowitz IT, Schechter JC, et al. (2013): Empathic responsiveness in amygdala and anterior cingulate cortex in youths with psychopathic traits. *Journal of child psychology and psychiatry*. 54:900-910.

83. Passamonti L, Fairchild G, Goodyer IM, Hurford G, Hagan CC, Rowe JB, et al. (2010): Neural abnormalities in early-onset and adolescence-onset conduct disorder. *Archives of general psychiatry*. 67:729-738.

84. Schwenck C, Ciaramidaro A, Selivanova M, Tournay J, Freitag CM, Siniatchkin M (2017): Neural correlates of affective empathy and reinforcement learning in boys with conduct problems: fMRI evidence from a gambling task. *Behavioural brain research*. 320:75-84.
85. Thornton LC, Penner EA, Nolan ZT, Adalio CJ, Sinclair S, Meffert H, et al. (2017): The processing of animacy information is disrupted as a function of callous-unemotional traits in youth with disruptive behavior disorders. *NeuroImage: Clinical*. 16:498-506.
86. White SF, Williams WC, Brislin SJ, Sinclair S, Blair KS, Fowler KA, et al. (2012): Reduced activity within the dorsal endogenous orienting of attention network to fearful expressions in youth with disruptive behavior disorders and psychopathic traits. *Development and psychopathology*. 24:1105-1116.
87. White SF, Marsh AA, Fowler KA, Schechter JC, Adalio C, Pope K, et al. (2012): Reduced amygdala response in youths with disruptive behavior disorders and psychopathic traits: decreased emotional response versus increased top-down attention to nonemotional features. *American Journal of Psychiatry*. 169:750-758.
88. White SF, Pope K, Sinclair S, Fowler KA, Brislin SJ, Williams WC, et al. (2013): Disrupted expected value and prediction error signaling in youths with disruptive behavior disorders during a passive avoidance task. *American Journal of Psychiatry*. 170:315-323.
89. White SF, Fowler KA, Sinclair S, Schechter JC, Majestic CM, Pine DS, et al. (2014): Disrupted expected value signaling in youth with disruptive behavior disorders to environmental reinforcers. *Journal of the American Academy of Child & Adolescent Psychiatry*. 53:579-588. e579.
90. Zhang J, Li B, Gao J, Shi H, Wang X, Jiang Y, et al. (2015): Impaired frontal-basal ganglia connectivity in male adolescents with conduct disorder. *PloS one*. 10:e0145011.
91. Zhu Y, Ying K, Wang J, Su L, Chen J, Lin F, et al. (2014): Differences in functional activity between boys with pure oppositional defiant disorder and controls during a response inhibition task: a preliminary study. *Brain imaging and behavior*. 8:588-597.
92. Raschle NM, Fehlbaum LV, Menks WM, Martinelli A, Prätzlich M, Bernhard A, et al. (2019): Atypical dorsolateral prefrontal activity in female adolescents with conduct disorder during effortful emotion regulation. *Biological Psychiatry: Cognitive Neuroscience and Neuroimaging*. 4:984-994.
93. Yang P, Wu M-T, Hsu C-C, Ker J-H (2004): Evidence of early neurobiological alternations in adolescents with posttraumatic stress disorder: a functional MRI study. *Neuroscience letters*. 370:13-18.
94. Carrion VG, Garrett A, Menon V, Weems CF, Reiss AL (2008): Posttraumatic stress symptoms and brain function during a response-inhibition task: an fMRI study in youth. *Depression and anxiety*. 25:514-526.
95. Keding TJ, Herringa RJ (2016): Paradoxical prefrontal-amygdala recruitment to angry and happy expressions in pediatric posttraumatic stress disorder. *Neuropsychopharmacology*. 41:2903-2912.
96. Hart H, Lim L, Mehta M, Simmons A, Mirza K, Rubia K (2018): Altered fear processing in adolescents with a history of severe childhood maltreatment: an fMRI study. *Psychological medicine*. 48:1092-1101.
97. Carlisi CO, Hilbert K, Guyer AE, Ernst M (2017): Sleep-amount differentially affects fear-processing neural circuitry in pediatric anxiety: a preliminary fMRI investigation. *Cognitive, Affective, & Behavioral Neuroscience*. 17:1098-1113.

98. Gold AL, Abend R, Britton JC, Behrens B, Farber M, Ronkin E, et al. (2020): Age differences in the neural correlates of anxiety disorders: An fMRI study of response to learned threat. *American Journal of Psychiatry*. 177:454-463.
99. Thomas KM, Drevets WC, Dahl RE, Ryan ND, Birmaher B, Eccard CH, et al. (2001): Amygdala response to fearful faces in anxious and depressed children. *Archives of general psychiatry*. 58:1057-1063.
100. Monk CS, Nelson EE, McClure EB, Mogg K, Bradley BP, Leibenluft E, et al. (2006): Ventrolateral prefrontal cortex activation and attentional bias in response to angry faces in adolescents with generalized anxiety disorder. *American Journal of Psychiatry*. 163:1091-1097.
101. Monk CS, Telzer EH, Mogg K, Bradley BP, Mai X, Louro HM, et al. (2008): Amygdala and ventrolateral prefrontal cortex activation to masked angry faces in children and adolescents with generalized anxiety disorder. *Archives of general psychiatry*. 65:568-576.
102. Strawn JR, Bitter SM, Weber WA, Chu WJ, Whitsel RM, Adler C, et al. (2012): Neurocircuitry of generalized anxiety disorder in adolescents: a pilot functional neuroimaging and functional connectivity study. *Depression and Anxiety*. 29:939-947.
103. Yin D, Liu W, Zeljic K, Lv Q, Wang Z, You M, et al. (2017): Failure in cognitive suppression of negative affect in adolescents with generalized anxiety disorder. *Scientific reports*. 7:1-11.
104. Burkhouse KL, Kujawa A, Hosseini B, Klumpp H, Fitzgerald KD, Langenecker SA, et al. (2018): Anterior cingulate activation to implicit threat before and after treatment for pediatric anxiety disorders. *Progress in Neuro-Psychopharmacology and Biological Psychiatry*. 84:250-256.
105. Blair KS, Geraci M, Korelitz K, Otero M, Towbin K, Ernst M, et al. (2011): The pathology of social phobia is independent of developmental changes in face processing. *American Journal of Psychiatry*. 168:1202-1209.
106. Chantiluke K, Halari R, Simic M, Pariante CM, Papadopoulos A, Giampietro V, et al. (2012): Fronto-striato-cerebellar dysregulation in adolescents with depression during motivated attention. *Biological psychiatry*. 71:59-67.
107. Colich NL, Foland-Ross LC, Eggleston C, Singh MK, Gotlib IH (2016): Neural aspects of inhibition following emotional primes in depressed adolescents. *Journal of Clinical Child & Adolescent Psychology*. 45:21-30.
108. Davey CG, Allen NB, Harrison BJ, Yücel M (2011): Increased amygdala response to positive social feedback in young people with major depressive disorder. *Biological psychiatry*. 69:734-741.
109. Diler RS, de Almeida JRC, Ladouceur C, Birmaher B, Axelson D, Phillips M (2013): Neural activity to intense positive versus negative stimuli can help differentiate bipolar disorder from unipolar major depressive disorder in depressed adolescents: a pilot fMRI study. *Psychiatry Research: Neuroimaging*. 214:277-284.
110. Diler RS, Pan LA, Segreti A, Ladouceur CD, Forbes E, Cela SR, et al. (2014): Differential anterior cingulate activity during response inhibition in depressed adolescents with bipolar and unipolar major depressive disorder. *Journal of the Canadian Academy of Child and Adolescent Psychiatry*. 23:10.
111. Gaffrey MS, Barch DM, Singer J, Shenoy R, Luby JL (2013): Disrupted amygdala reactivity in depressed 4-to 6-year-old children. *Journal of the American Academy of Child & Adolescent Psychiatry*. 52:737-746.

112. Halari R, Simic M, Pariante CM, Papadopoulos A, Cleare A, Brammer M, et al. (2009): Reduced activation in lateral prefrontal cortex and anterior cingulate during attention and cognitive control functions in medication-naïve adolescents with depression compared to controls. *Journal of Child Psychology and Psychiatry*. 50:307-316.
113. Hall LM, Klimes-Dougan B, Hunt RH, Thomas KM, Hourri A, Noack E, et al. (2014): An fMRI study of emotional face processing in adolescent major depression. *Journal of affective disorders*. 168:44-50.
114. Roberson-Nay R, McClure EB, Monk CS, Nelson EE, Guyer AE, Fromm SJ, et al. (2006): Increased amygdala activity during successful memory encoding in adolescent major depressive disorder: an fMRI study. *Biological psychiatry*. 60:966-973.
115. Sharp C, Kim S, Herman L, Pane H, Reuter T, Strathearn L (2014): Major depression in mothers predicts reduced ventral striatum activation in adolescent female offspring with and without depression. *Journal of abnormal psychology*. 123:298.
116. Tao R, Calley CS, Hart J, Mayes TL, Nakonezny PA, Lu H, et al. (2012): Brain activity in adolescent major depressive disorder before and after fluoxetine treatment. *American Journal of Psychiatry*. 169:381-388.
117. Yang TT, Simmons AN, Matthews SC, Tapert SF, Frank GK, Bischoff-Grethe A, et al. (2009): Depressed adolescents demonstrate greater subgenual anterior cingulate activity. *Neuroreport*. 20:440.
118. Yang TT, Simmons AN, Matthews SC, Tapert SF, Frank GK, Max JE, et al. (2010): Adolescents with major depression demonstrate increased amygdala activation. *Journal of the American Academy of Child & Adolescent Psychiatry*. 49:42-51.
119. Pan LA, Batezati-Alves SC, Almeida JR, Segreti A, Akkal D, Hassel S, et al. (2011): Dissociable patterns of neural activity during response inhibition in depressed adolescents with and without suicidal behavior. *Journal of the American Academy of Child & Adolescent Psychiatry*. 50:602-611. e603.
120. Pan L, Segreti A, Almeida J, Jollant F, Lawrence N, Brent D, et al. (2013): Preserved hippocampal function during learning in the context of risk in adolescent suicide attempt. *Psychiatry Research: Neuroimaging*. 211:112-118.
121. Groschwitz RC, Plener PL, Groen G, Bonenberger M, Abler B (2016): Differential neural processing of social exclusion in adolescents with non-suicidal self-injury: An fMRI study. *Psychiatry Research: Neuroimaging*. 255:43-49.
122. Suzuki H, Luby JL, Botteron KN, Dietrich R, McAvoy MP, Barch DM (2014): Early life stress and trauma and enhanced limbic activation to emotionally valenced faces in depressed and healthy children. *Journal of the American Academy of Child & Adolescent Psychiatry*. 53:800-813. e810.
123. De Bellis MD, Hooper SR (2012): Neural substrates for processing task-irrelevant emotional distracters in maltreated adolescents with depressive disorders: A pilot study. *Journal of traumatic stress*. 25:198-202.
